# Resources for image-based high-throughput phenotyping in crops and data sharing challenges

Monica F. Danilevicz <sup>1</sup>, Philipp E. Bayer <sup>1</sup>, Benjamin J. Nestor <sup>1</sup>, Mohammed Bennamoun <sup>2</sup> and David Edwards <sup>1,\*†</sup>

<sup>1</sup> School of Biological Sciences and Institute of Agriculture, University of Western Australia, Perth, Western Australia 6009, Australia

<sup>2</sup> Department of Computer Science and Software Engineering, University of Western Australia, Perth, Western Australia 6009, Australia

\*Author for communication: dave.edwards@uwa.edu.au

†Senior author.

M.F.D. wrote the manuscript with input and edits from P.E.B., M.B., B.J.N., and D.E.

The author responsible for distribution of materials integral to the findings presented in this article in accordance with the policy described in the Instructions for Authors (<https://academic.oup.com/plphys/pages/general-instructions>) is: David Edwards (dave.edwards@uwa.edu.au).

## Abstract

High-throughput phenotyping (HTP) platforms are capable of monitoring the phenotypic variation of plants through multiple types of sensors, such as red green and blue (RGB) cameras, hyperspectral sensors, and computed tomography, which can be associated with environmental and genotypic data. Because of the wide range of information provided, HTP datasets represent a valuable asset to characterize crop phenotypes. As HTP becomes widely employed with more tools and data being released, it is important that researchers are aware of these resources and how they can be applied to accelerate crop improvement. Researchers may exploit these datasets either for phenotype comparison or employ them as a benchmark to assess tool performance and to support the development of tools that are better at generalizing between different crops and environments. In this review, we describe the use of image-based HTP for yield prediction, root phenotyping, development of climate-resilient crops, detecting pathogen and pest infestation, and quantitative trait measurement. We emphasize the need for researchers to share phenotypic data, and offer a comprehensive list of available datasets to assist crop breeders and tool developers to leverage these resources in order to accelerate crop breeding.

## Introduction

Plant phenotypic variation is the result of the complex interplay between genetics and environmental conditions (Boyer, 1982; Ficke et al., 2018; Frantzeskakis et al., 2020). Advances in genome sequencing have uncovered substantial genetic diversity within species (Hirsch et al., 2014; Golicz et al., 2016; Zhao et al., 2018; Hübner et al., 2019; Song et al., 2020). However, the wealth of genetic information is rarely translated into gains for real-world agricultural crops (Araus et al., 2018), partially due to the lack of phenotypic information associated with the genetic variation (Furbank and Tester, 2011; Mir et al., 2019).

High-throughput phenotyping (HTP) has emerged to overcome the phenomics bottleneck. HTP platforms enable noninvasive data collection through several types of sensors that can be deployed in glasshouse facilities or field monitoring devices, including ground platforms to unmanned aerial vehicles (UAVs) and satellites (Li et al., 2014; Hank et al., 2015; Kirchgessner et al., 2016; Naito et al., 2017; Danzi et al., 2019). These platforms can support the capture of temporal phenotypic variation for large populations across plant development, generating massive amounts of data. Systematic large-scale phenotyping platforms can be used for genetic dissection of targeted traits

Received December 4, 2020. Accepted May 26, 2021. Advance access publication June 28, 2021

© The Author(s) 2021. Published by Oxford University Press on behalf of American Society of Plant Biologists.

This is an Open Access article distributed under the terms of the Creative Commons Attribution-NonCommercial-NoDerivs licence (<http://creativecommons.org/licenses/by-nc-nd/4.0/>), which permits non-commercial reproduction and distribution of the work, in any medium, provided the original work is not altered or transformed in any way, and that the work is properly cited. For commercial re-use, please contact [journals.permissions@oup.com](mailto:journals.permissions@oup.com)

Open Access

### ADVANCES

- A broad diversity of sensors enables capturing and quantifying previously undetectable phenotypic traits. Combining the reflectance of different spectra allows for the detection of abiotic stress, such as nitrogen deficiency and frost damage.
- HTP has the potential to accelerate crop breeding, producing data that can be used to identify varieties with improved traits and higher performance, but there are technical challenges to overcome.
- Deep learning models are effective in plant phenotyping tasks due to their capacity to leverage highly complex and multidimensional data, but their performance is dependent on the quality and diversity of the dataset.
- A large effort is required to facilitate sharing high-quality phenotype datasets because they provide a key resource for developing tools for agronomic trait measurement and crop breeding.

and assist the development of better performing varieties (Li et al., 2018; Mir et al., 2019). The increasing adoption of HTP platforms leads to a demand for new computer-based tools that can leverage these datasets and integrate-associated information (e.g. experimental conditions, weather measurements, and genotypic data) to extract meaningful insights regarding crop development and performance (Tattaris et al., 2016; van Eeuwijk et al., 2019). HTP data analysis is a nontrivial task, requiring a high level of expertise in computer science and plant development to understand the implications of phenotypic variation in the plant. Completeness of HTP metadata is crucial for plant physiologists to characterize the genetic and environmental conditions in which a phenotype occurs. Even though the majority of available datasets are lacking a clear description of conditions depicted, it is important that new datasets include metadata and methods to collect environmental data in their experimental design. Mathematical models, machine learning, and most recently deep learning models, can be used as guides to identify stress and predict crop performance under defined conditions (Bai et al., 2016; Atkinson et al., 2017a; Joalland et al., 2017; Moghadam et al., 2017; Naito et al., 2017; Fernandez-Gallego et al., 2018; Prey et al., 2019; Walter et al., 2019; Ducournau et al., 2020; Kerkech et al., 2020; Selvaraj et al., 2020). Deep learning models have the advantage of automatically extracting features from the image by constructing increasingly abstract representations of the relationships within the dataset (LeCun et al., 2015). In contrast, classic statistical approaches rely solely on the

researcher to manually define the features before the analysis. Because deep learning models build the features based solely on the dataset, it usually requires large amounts of high-quality data to learn from these features to achieve high performance.

Developing a custom pipeline of software applications for processing HTP raw sensor data into traits, followed by its analysis, amounts to a major part of the cost to adopt HTP (Reynolds et al., 2019). However, if the data analysis pipeline is being reutilized from a previous project, the cost of implementing the pipeline would drop to 10%–20% (Reynolds et al., 2019), which means that being able to employ whole or part of a developed HTP analysis pipeline can decrease the costs for adopting HTP in research projects. Many challenges prevent the research community from efficiently reusing data processing tools and analysis pipelines. For example, the lack of interoperability between processing tools (image processing, weather data transformation) and analysis models (trait quantification, classification) due to the absence of standardized data processing methodology prevent the utilization of previously published analysis models (Krajewski et al., 2015; Janssen et al., 2017; Yu et al., 2017; van Eeuwijk et al., 2019). The inconsistency of data processing pipelines can be partially overcome by providing tools to standardize data input for target analysis models (Busemeyer et al., 2013; Yu et al., 2017; Chopin et al., 2018; Selvaraj et al., 2020); however, a robust solution requires standardizing syntax (formats) and semantics (definitions, ontology) of input/output files used by HTP data processing tools (Janssen et al., 2017).

Data sharing is an important step for the advancement of crop breeding and the development of analysis pipelines (Zamir, 2013; Mir et al., 2019). The need to establish a repository to host raw phenotypic datasets with associated information has long been recognized (Zamir, 2013; Lobet, 2017). A centralized database with access to raw data and standardized metadata would increase discoverability and reutilization of the datasets, allowing researchers to reanalyze data using updated state-of-the-art tools, which may lead to the identification of novel and potentially interesting results (Zamir, 2013). Even though some platforms have been developed to host selected datasets (Granier et al., 2006; Lobet et al., 2013; Seren et al., 2017), the majority of datasets are insufficiently described, preventing plant researchers from properly analyzing phenotypic variations and leading to misinterpretation of results. The Minimum Information About a Plant Phenotyping Experiment (MIAPPE) initiative (<https://www.miappe.org/>) provides a framework for phenotypic data sharing designed to standardize data publication with a controlled ontology vocabulary referencing multiple previously established ontologies (Papoutsoglou et al., 2020). The MIAPPE guidelines are compatible with the Breeding Application Programming Interface (BrAPI), which aim to increase breeding datasets interoperability and provide easy access to breeding tools (Selby et al., 2019; Papoutsoglou et al., 2020). Adoption of these standardization guidelines for dataset description is a crucial step in transforming HTP datasets into data assets for plant researchers and breeders.

Adequately described datasets can also be used to establish benchmark datasets (detailed in [Box 1](#)). Benchmark datasets provide a standard to compare computer-based tools performance, helping uncover the tool limitations and strengths ([Zamir, 2013](#); [Minervini et al., 2016](#); [Lobet, 2017](#)). Assessing tool performance will guide the user to apply the most effective methodology for their experimental design and data ([Lobet, 2017](#)). This review reports on previously published image-based HTP datasets with the aim of assisting the community to access and benefit from their development. The main contributions presented are (1) highlighting the challenges faced by researchers when reusing HTP datasets; (2) describing some of the criteria required when creating an effective benchmark dataset; and (3) presenting a collection of image-based HTP datasets available as a resource for researchers to improve model development and analysis.

## Applications of HTP

### Improving crop productivity

A myriad of components contribute to yield, as plant performance is regulated by a combination of genetic factors (G), environmental factors (E), and the interaction between them ( $G \times E$ ; [Juliana et al., 2018](#); [Montesinos-López et al., 2018](#)). Because of the high complexity that underlies plant performance, breeders have to submit potential varieties to extensive field testing to determine their potential yield ([Hunt et al., 2020](#)). Field HTP can substantially accelerate the breeding process by allowing breeders to predict end-of-season traits, such as yield and biomass at early growth stages. Early yield prediction allows researchers to bypass plant growth time, a key limiting factor in crop breeding. In

a soybean (*Glycine max*) study, 2,551 genotypes were grown in different locations, and it was observed that yield, plant maturity, and seed size can be predicted at an early stage using Cubist regression because it presented the best result in comparison to Partial Least Squares Regression, Random Forests, Artificial Neural Networks, and Support Vector Regression ([Yuan et al., 2019](#)). Similar results were observed for wheat (*Triticum aestivum*), barley (*Hordeum vulgare*), and other soybean genotypes ([Bai et al., 2016](#); [Nevavuori et al., 2019](#)). Although promising, the results are constrained to the conditions evaluated, since interannual weather variation, changes in agroecological zones, differences in farm management practices, sensor use and specifications, and other factors can cause instability in model accuracy.

The broad diversity of remote sensors enables capturing different aspects of the plant phenotype. Different combinations of RGB, multispectral, and thermal image data associated with weather and soil have been employed to train deep learning models for crop yield forecasting ([Vega et al., 2015](#); [Gracia-Romero et al., 2019](#); [Zhang et al., 2019a](#); [Maimaitijiang et al., 2020](#); [da Silva et al., 2020](#)). The models can support differentiating crop performance in relation to irrigation regimes ([Gracia-Romero et al., 2019](#)), quantify growth rate under nitrogen treatment ([Holman et al., 2016](#); [Arroyo et al., 2017](#); [Aranguren et al., 2020](#)), estimate variation of wheat grain protein content ([Rodrigues et al., 2018](#); [Sharabiani et al., 2019](#)), and monitor crop height variation during the season ([Ziliani et al., 2018](#)). A systematic review on machine learning models for crop yield prediction was published by [van Klompenburg et al. \(2020\)](#), showing that deep learning models are increasing in popularity. The most used architectures were Convolutional Neural Networks

### Box 1 WHAT IS A BENCHMARKING DATASET?

Benchmark dataset refers to a comprehensive data collection that represents real life data that a method or tool may encounter when performing the given task. Benchmark datasets are often employed as a standardized way to assess a new method's performance, finding its strengths, and limitations ([Lobet, 2017](#)). General requisites for benchmark datasets in most of the applications described in this study are: (1) intentional, the dataset must be designed to be employed on specific tasks; (2) relevant, the data should be coherent with the event it attempts to describe and have the limitations identified and clearly stated; (3) representative, meaning that the dataset covers most cases commonly encountered when performing a task within the defined scope ([Schaafsma and Vihinen, 2018](#)), reporting any underrepresented classes; (4) sizable, the dataset must contain enough examples of each class or target to enable training machine learning and computer vision methods; (5) reliable, the data points must be experimentally obtained instead of artificially generated and annotations must be performed by plant experts ([Sasidharan Nair and Vihinen, 2013](#)); and (6) descriptive, the dataset must have an extensive description of data collection methodology (sensors, UAV altitude), biological information (species, genotype, growth stage), and experimental conditions (temperature, soil, water availability). The importance of these criteria changes depending on the purpose of the dataset utilization. For computer tool developers, the first five criteria are probably more relevant as they can directly impact the performance and robustness of the new method. For plant physiology researchers, the sixth criteria is particularly important as it enables reutilization of the datasets to gain a deep understanding of the plant conditions, extract meaningful insights from plant phenotype analysis, and compare plant phenotype analyses with external phenotypic datasets.

(CNNs) and Long-Short Term Memory (LSTM). These architectures were created for different purposes: LSTM is designed specifically for sequence prediction tasks, while CNN's structure is suited to extract features from complex image data. These architectures can benefit from transferred learning, in which pretrained weights obtained with different data can be implemented in the new model (He et al., 2016) that allows rapid and high performance. Multimodal machine learning can be employed to analyze datasets with multiple data sources (rainfall, temperature, multispectral image, soil data), each data type is a modality that will be analyzed and combined to increase model performance (Baltrušaitis et al., 2017). van Klompenburg et al. (2020) observe in the review that temperature, rainfall, and soil type were the most used data types in machine learning models, but different feature combinations and the volume of data can directly impact the model performance and should be tested during development.

A few HTP datasets were recently released with the goal to improve yield prediction and more specifically support genotype to phenotype prediction. The Genomes to Field (G2F) datasets comprise genotype (single nucleotide polymorphism information), manual phenotype measurements, climatic data, soil information, inbred ear images, and UAV collected multispectral and hyperspectral images of several maize (*Zea mays*) varieties grown over multiple years (Supplemental Data Set 1; McFarland et al., 2020). Detailed metadata are essential for understanding genotype to phenotype relationships in each season/environment. However, the G2F field trials were carried out in a single location, which limit the robustness of the traits identified. For sorghum (*Sorghum bicolor*) and wheat, the Transportation Energy Resources from Renewable Agriculture Phenotyping Reference Platform (TERRA-REF) database offers a comprehensive resource of sensor data (five thermal, spectral, and shape imaging sensors), phenotypic measurements, environmental and genomic data, including genome sequencing of 384 varieties and genotyping by sequencing of 768 varieties (Supplemental Data Set 1; LeBauer et al., 2017; Burnette et al., 2018). TERRA-REF has four sensing platforms to collect image-based phenotyping and agronomic traits from both controlled environment and field grown plants. TERRA-REF maintains a manuscript management section in their website where researchers willing to use the data can register their proposed manuscript to prevent overlap and encourage collaboration. Oftentimes, researchers will delay publishing datasets until their planned publications are completed. Nonetheless, the TERRA-REF approach to register publications enables early publishing of the data and allows other groups to explore different aspects of the dataset or collaborate. Federated learning is another strategy that can be used when the data must be protected due to privacy or security concerns, showing increasing use in medical research (Lee et al., 2018; Huang et al., 2019; Rieke et al., 2020). Federated learning allows for training machine learning models collaboratively without exchanging the data, in this framework,

each dataset owner institution downloads the model and trains it locally. The trained parameters from each institution are exported and aggregated, creating a model that benefits from previously inaccessible datasets while the data governance and accessibility remain in the control of the data owner (Konečný et al., 2016).

Both G2F and TERRA-REF datasets present limitations regarding the types of environments represented, species grown, and the treatments that they were subjected to. Other similar phenotyping initiatives covering different locations and plant species (including noncrop plants) are needed to depict phenotypic variation. Nonetheless, the above datasets offer an extensive resource that can assist the identification of quantitative trait loci (QTLs) related to crop performance, develop tools for genotype to phenotype prediction based on the multidimensional dataset, and ultimately these could be used as benchmark datasets to assess tool performance. Moreover, smaller datasets for field trial experiments can be found at the Global Agricultural Research Data Innovation Acceleration Network and the International Maize and Wheat Improvement Center described in Supplemental Data Set 1.

Grain yield in wheat is directly related to spike head population density, size, and maturity stage. The Annotated Crop Image Dataset (ACID) provides images with coordinates to identify wheat spikes under greenhouse conditions (Pound et al., 2017b). ACID was designed for training novel tools for identifying the spike heads, and measuring individual head traits, but the tool could be further applied to new datasets and to link measured traits with genotypic variability. Limited metadata annotation in ACID prevents further exploration of the dataset itself for identification of yield-related traits because the genotypes and experimental conditions are not described. The global wheat head database compiles multiple RGB wheat images collected in the field, from several countries using different cameras (David et al., 2020). The dataset was used in a challenge hosted on Kaggle (<https://www.kaggle.com>) with the goal to benchmark wheat head detection approaches. Top solutions used object detection deep learning architectures (EfficientDet, FasterRCNN, and Yolo-v3), with data augmentation techniques playing a major role for their success. Data augmentation is a computer vision technique to increase dataset size through a series of transformations, such as flipping or rotating the image (Buslaev et al., 2020). It is important to note that with field images, a greater variability of conditions can occur such as genotype differences, head orientation, and mixed developmental stages, which can cause the object detection model to present performance instability such as mislabeling plant organs at a higher rate when the conditions differ from what was seen in the training data. The global wheat head dataset provides a valuable resource for developing and benchmarking tools due to the high variability of wheat genotypes and conditions represented. Similar datasets for different species can be developed collaboratively by annotating previously released HTP data (such as

the G2F and TERRA-REF datasets). This can decrease the cost of producing a dataset and benefit from the described metadata.

### Developing crops tolerant to abiotic stress

The development of climate resilient crops must consider the effect of combined abiotic stresses occurring in the region (Cammarano et al., 2019). As a result, datasets featuring combined abiotic stresses provide a resource to understand how their interaction impacts plant health and development. The Eschikon dataset (Supplemental Data Set 2) includes temporal images of beet (*Beta vulgaris*) under multiple independent and combined drought, nitrogen deficiency, and weed stresses (Khanna et al., 2019). This dataset was employed to develop 3D representations of the plants from which the authors were able to extract canopy cover, height, and vegetation indices. These traits were used to classify stress in plants with 83%–93% accuracy depending on the stress measured. The dataset can be further explored to measure agronomic traits related to each stress and understand plant response, it can also be employed in further developing computer vision tools for stress classification (Khanna et al., 2019). Plant researchers willing to predict the effects of climatic change in crop species will require the creation (or release) of more datasets in which the combined stresses are observed. These datasets must offer a detailed description of the environmental conditions and if possible, of the genetic data to enable accurate interpretation of the results. Ideally, the aggregated datasets must depict the diversity of agroecological zones including low latitude locations, which are currently underrepresented.

Crop water management is essential in regions currently facing or predicted to face water scarcity. Infrared thermography has been successfully implemented to assess water use by crops (Nhamo et al., 2020), and for measuring genotype performance under salinity or water deficit stress (Raza et al., 2014; Kumar et al., 2017; Thapa et al., 2018; Hou et al., 2019; Zhang et al., 2019b; Kumar et al., 2020; Masina et al., 2020). In cotton (*Gossypium arboreum*) monitored by infrared thermography, it was observed that yield, fiber length, and micronaire suffered reduction after canopy temperature exceeded a given threshold (Conaty et al., 2015). Canopy temperature and evapotranspiration (ET) maps are used as a proxy for measuring the phenotypic response to both stresses as they influence stomatal conductance (Fischer et al., 1998; Sirault et al., 2009), and are observed from close range, at the aerial and spatial level. Remotely sensed thermal data collected by satellite platforms allow mapping water resource use through the prediction of ET maps (Anderson et al., 2012). In 2018, a space station mission (ECOSTRESS) was launched to measure ET and identify plant stress (Fisher et al., 2020). It provides a higher spatial and temporal resolution ratio (60 m with 1–5 d interval) in comparison to Landsat (>60 m, 16-d interval) or MODIS (>375 m, daily; Anderson et al., 2012). The ECOSTRESS library provides satellite imagery associated with laboratory

measurements of vegetation to help correlate the spectral patterns (Meerdink et al., 2019; Fisher et al., 2020). This dataset has been employed to assess plant species diversity in restoration areas, showing that sites with higher species diversity present lower temperatures (Hamberg et al., 2020). For this review, we chose to focus on HTP images collected by aerial or ground devices since satellite images currently do not yet provide enough resolution to be used for assessing plants at the field level. However, satellite HTP imagery offers the potential to help understand abiotic stress at a large-scale (Anderson et al., 2012; Miralles et al., 2014), thus we have included links to satellite libraries (ECOSTRESS, Landsat and MODIS) in the resources in Supplemental Data Set 2.

Besides infrared thermography, multispectral and hyperspectral sensors are also used in HTP. These sensors are capable of detecting physiological changes in the plant leaf composition (Bruning et al., 2020). For example, decomposition of foliar hyperspectral signatures showed that C3 and C4 plants have divergent and well-defined patterns of reflectance (Baranoski et al., 2016). Hyperspectral images were employed to quantitatively rank salt tolerance between four wheat varieties (dataset available in Supplemental Data Set 2) using machine learning and dimensionality reduction. The authors observed that multiple trait measurements would be required to correctly assess the plants, whereas with hyperspectral images they were able to score them in a fast noninvasive way, dataset is described in Supplemental Data Set 2 (Moghimi et al., 2018). Multispectral and hyperspectral images have also been employed to identify salt stress in sugarcane (*Saccharum officinarum* L.) and wheat irrigated with saline water (Hamzeh et al., 2013; El-Hendawy et al., 2019), acidic and heavy metal stress (Liu et al., 2011; Jin et al., 2013; Li et al., 2015; Zhang et al., 2017; Wang et al., 2018a), nutrient deficiency (Pacumbaba and Beyl, 2011), heat stress (Gautam et al., 2015; Trachsel et al., 2019), and frost (Fitzgerald et al., 2019; Nuttall et al., 2019; Murphy et al., 2020).

Frost damage in wheat can have a major impact, as a single frost event can severely reduce quality and yield (Boer et al., 1993; Frederiks et al., 2012; Martino and Abbate, 2019). Rapid detection of frost damage would enable growers to take management decisions to avoid losses. A study using hyperspectral images indicated that under controlled conditions, frosted and nonfrosted individuals, present significant spectral differences (Murphy et al., 2020). Mixed results were observed when detecting frost under field conditions, indicating that more research is needed (Fitzgerald et al., 2019; Nuttall et al., 2019). The Frost nursery dataset provides multispectral images of several commercial wheat varieties grown in the field and were affected by frost at different developmental stages (AgReFed, 2019). This dataset includes final yield, leaf protein, and abundance of metabolites, which can be used to characterize the effect of frost (Supplemental Data Set 2). The association of hyperspectral data with physiological measurements may assist frost damage

quantification, which can support crop breeders screening for more tolerant varieties. Hyperspectral imagery has the potential to capture traits related to the biochemical composition of target tissues. However, due to various technical factors, the recorded data are usually noisy with nonnegligible redundancy (Mishra et al., 2019). Datasets including hyperspectral data may benefit from detailed description of the experimental conditions and sensors used, helping guide researchers how to better extract the information.

Platforms such as Quantitative Plant (Lobet et al., 2013), Phenopsis (Granier et al., 2006), and BrAPI (Selby et al., 2019) are dedicated to assemble a wide range of phenotyping datasets that can be used to compare phenotypic response to stress within and between species. These platforms are focused on making phenotypic datasets more findable. Information and website links for other abiotic stress datasets are described in [Supplemental Data Set 2](#).

### Pathogen and pest detection in the field

Changes in environmental conditions are likely to shift pathogen and pest regional distributions (Hovmöller et al., 2008; Shaw and Osborne, 2011; Bebbler et al., 2013; Garrett, 2013; Mariette et al., 2016; Skelsey et al., 2016). To provide suitable crop varieties and agricultural management recommendations for these new conditions, it is necessary to gain greater understanding of the ecological, phenotypic, and molecular basis of the interaction between plant and pathogens (Skelsey et al., 2016). Pathogen identification and disease severity estimation are an important part of characterizing their distribution in the field (Ali and Hodson, 2017). The detection and quantification of disease are usually performed by visually assessing crop symptoms, which may be subjected to bias and human error, besides being labor and time intensive. Various datasets have been released to assist the development of automated systems for disease identification and assessment ([Supplemental Data Set 3](#)). The Plant Village, BRACOL, RoCoLe, citrus (*Citrus sp.*), cassava (*Manihot esculenta*), and apple (*Malus sp.*) datasets offer close range annotated images of infected plant organs against a clean background, offering a resource for disease diagnosis and severity scoring in collected leaves (Mohanty, 2016; Arsenovic et al., 2019; Chouhan et al., 2019; Krohling, 2019; Parraga-Alava et al., 2019; Rauf et al., 2019; Tian et al., 2019; Nakatumba-Nabende et al., 2020; Singh et al., 2020). Machine learning models using support vector machines, CNNs, and self-attention CNNs trained on similar datasets were published recently (Abdu et al., 2020; El Abidine et al., 2020; Zeng and Li, 2020), some of which report increased efficiency when using segmented regions for pathogen identification (Esgario et al., 2020; Karlekar and Seal, 2020). A comprehensive review on machine learning for disease assessment in crops was published by Hasan et al. (2020).

Although disease detection models trained with the above datasets can be used in the field, the input samples have to be manually collected and imaged which can be time consuming. Hence, many researchers have focused on developing models that use UAV-collected images to accelerate

disease detection (Vergara-Diaz et al., 2015; Sugiura et al., 2016; Moriya et al., 2019; Qiu et al., 2019; Tetila et al., 2020; Zhao et al., 2020). (Marzougui et al., 2019) combined HTP images from greenhouse and field experiments to quantify *Aphanomyces* root rot resistance in lentils (*Lens culinaris*). The authors developed 12 normalized spectral indices that correlate with disease symptoms and severity, allowing breeders to objectively quantify genotype resistance. Another study used hyperspectral data and machine learning for early identification of charcoal rot disease in soybean, obtaining classification accuracy of 90% for plants 3 d after infection (Nagasubramanian et al., 2018). These studies demonstrate the potential of image-based HTP to enable growers and breeders to automatically screen plants. To the best of our knowledge, there are no available datasets for disease-related tasks in the field which prevents the development and benchmarking of computer vision-based tools. Benchmark datasets created for this task requirements are shown in [Box 1](#), with specific image annotations depending on the target task (disease detection, identification, severity scoring, and lesion segmentation).

Field HTP is widely applied to the detection and quantification of pests. Rapid pest identification is important so growers can take action to control pest spread and limit damage to crops. A large benchmark dataset for insect pest detection was released containing 75,000 close range images of annotated pests belonging to 102 categories (see [Supplemental Data Set 3](#) for a detailed description; Wu et al., 2019). This benchmark dataset is a valuable resource for the development of crop monitoring and management approaches, allowing researchers to test model performance over a wide range of pests. This dataset can also be complemented with the mango (*Mangifera indica*) pest classification dataset, which has images of mango plants infected with 15 different categories of pests, with a large volume of augmented images to increase model robustness (Kusrini et al., 2020a). Precise algorithms for the detection of pests can support assessing crop resistance by counting the pests, helping identify pest species in the field, and monitoring pest spread. Employing HTP datasets to measure plant–insect interactions can allow the use of RGB sensors to quantify leaf damage and defoliation (O’Neal et al., 2002). Thermal infrared and hyperspectral images can also be used to capture physiological changes, such as stomata regulation (Backoulou et al., 2011; Nabity et al., 2013). Novel datasets targeting the plant–insect interactions should follow the guidelines proposed in [Box 1](#) with special attention to providing detailed metadata (view MIAPPE project) and ground-truth measurements and labeling.

The development of navigation maps is particularly important for weed management systems, in which the map can be used for targeted herbicide application or by weed killing robots (Somerville et al., 2019; Gašparović et al., 2020; Hunter et al., 2020; Raja et al., 2020). Weed detection systems can reduce herbicide application by up to 60% in comparison to broadcast applications (Somerville et al., 2019; Hunter et al., 2020) and increase efficiency in organic

production systems. A key challenge for implementing weed detection in the field using image-based HTP data is the difficulty in establishing robust computer vision-based models that can distinguish between crop and weed species under varying field conditions. To help overcome this challenge, many datasets have been released consisting of RGB and multispectral images of a wide variety of weed and crop species, some of which contain pixel level annotations to separate the weed from background (Supplemental Data Set 3; Haug and Ostermann, 2015; Dos Santos Ferreira, 2017; Giselsson et al., 2017; Sa et al., 2018; Teimouri et al., 2018; Skovsen et al., 2019; Sudars et al., 2020). A few datasets feature images of weed seedlings, enabling the development of models that can detect weed infestation at an early stage. Studies using similar datasets employed computer vision and machine learning algorithms for weed detection, though these presented a high variability in the precision rate (69%–98%) depending on the crop field analyzed (Wang et al., 2007; dos Santos Ferreira et al., 2017; Pallottino et al., 2018; Umamaheswari et al., 2018; Bah et al., 2019; Partel et al., 2019). These results emphasize the need to produce more datasets with an increased variety of crop and weed species at different growth stages. Furthermore, the datasets need to reflect the management practices (e.g. sowing density) that the weed detection model would encounter in the field. Increasing model robustness to varied field conditions is essential to enable its adoption in agricultural management systems and allow plant researchers to quantify herbicide or other weed control practices efficiency.

### Root phenotyping

Root system architecture (RSA) greatly influences nutrient access, efficient water uptake, and plant tolerance to stress (Mary et al., 2018; York et al., 2018; Mattupalli et al., 2019; Busener et al., 2020; Griffiths et al., 2020; McKay Fletcher et al., 2020; Seo et al., 2020). Increased efforts in breeding for desirable RSA traits can drive a breakthrough in crop productivity and resource efficiency (Lynch, 2007). To leverage RSA potential in crop breeding, it is important that we improve current root phenotyping strategies.

Noninvasive RSA imaging is extremely challenging due to soil opacity. At the same time, soil replacements such as transparent gels or hydroponic mediums often lead to phenotypes that diverge substantially from the ones observed in regular soil (Hargreaves et al., 2009; Wojciechowski et al., 2009; Clark et al., 2011; Ma et al., 2019). A wide variety of sensors can be employed to acquire 2D or 3D images of plant root grown in the glasshouse, such as X-ray computed tomography, magnetic resonance imaging, positron emission tomography, and hyperspectral imaging (Jahnke et al., 2009; Garbout et al., 2012; Mooney et al., 2012; van Dusschoten et al., 2016; Bodner et al., 2018). In Supplemental Data Set 4, we list available RSA datasets with metadata at varied levels of detail including from plants grown in multiple types of media, such as gellan gum, soil, and hydroponics. In addition, a synthetic root system dataset is available. This large dataset was produced for tool calibration and modeling

since it provides ground-truth of fibrous and tap-root images which help identify artifacts generated by the model when dealing with complex, overlapping root structures. The data were produced using ArchiSimple with three levels of noise, and the roots present varying degrees of complexity (Lobet et al., 2017).

Field root phenotyping frequently requires the manual excavation of individual plants followed by imaging of the washed root crown system for quantitative trait analysis (Trachsel et al., 2011; Bucksch et al., 2014; Colombi et al., 2015). Root crown datasets of multiple crop species are described in Supplemental Data Set 4, some of which were produced with the aim to automatically quantify RSA traits using different tools. Noninvasive alternative approaches are not as commonly employed, but offer the potential to undertake a time-series analysis of crop development. These include electrical resistance tomography, electromagnetic inductance, and ground penetrating radar (Diaz and Herrero, 1992; Zenone et al., 2008; Srayeddin and Doussan, 2009), which are used to characterize root water uptake of wheat and vine plants in the field (Shanahan et al., 2015; Whalley et al., 2017; Mary et al., 2018).

Overall, image-based RSA phenotyping has many applications, such as linking RSA traits to micronutrient concentration and heritability (Busener et al., 2020; McKay Fletcher et al., 2020), the effect of dwarf genes in seedling roots (Wojciechowski et al., 2009), changes in the root crown in response to disease (Corona-Lopez et al., 2019; Mattupalli et al., 2019), to investigate root plasticity (Rosas et al., 2013), genetically driven root architecture differences (Jiang et al., 2019), and QTL mapping of regions controlling RSA (Topp et al., 2013). Most of the studies cited above use a combination of tools for RSA trait extraction (DIRT; Das et al., 2015), RhizoVision (Seethepalli and York, 2019), RSA-GiA (Galkovskiy et al., 2012; Topp et al., 2013), or Rootscape (Ristova et al., 2013)) followed by statistical analysis (variations of ANOVA, three-parameter logistic function, PCA) or linear regression to test if the observed traits relate to environmental or genetic data. The wide range of approaches used reflects the diversity of input data formats. The sensors employed to collect RSA traits are very diverse and capture different aspects of the root. Hence, the decision for which feature extraction tool and analysis method to implement must be decided case by case. Even more important in this case is tool and data interoperability because it will allow researchers to explore the resources efficiently. Root image datasets from several major crop species can be downloaded from the Quantitative Plant platform (quantitative-plant.org/dataset) and Zenodo database(zenodo.org/).

The reconstruction of the data as 2D or 3D representations of the root system, and root segmentation from the medium usually assumes a high contrast between root and background, which is not always the case (Atkinson et al., 2019). Machine and deep learning-based tools have been developed for root segmentation in 2D or 3D (Iyer-Pascuzzi et al., 2010; Bucksch et al., 2014; Falk et al., 2020; Yasrab et al., 2020a), including very thin (1–3 pixels) roots grown in

visible medium (RootNet; Yasrab et al., 2020b) and in soil (Soltaninejad et al., 2020), while other tools aimed for RSA trait quantification (Atkinson et al., 2017a; Falk et al., 2020). Although there are many potential approaches to perform root segmentation, most are not suited for newer image data types. In addition, few tools are capable of linking observed RSA to genotypic information. Recently, deep learning models have been employed to attempt to bridge phenotype to genotype predictions (Pound et al., 2017a; Yasrab et al., 2020a) and can achieve similar results for QTL identification as user supervised methods (Pound et al., 2017a). However, to effectively integrate high-throughput phenotype to genotype tools into the breeding process requires refined tools. These tools must be capable of dealing with phenotype and sensor variability and of aggregating experimental metadata into the analysis. The success in the development of such tools relies on the quality and size of the available datasets because these are the sole source of information for the deep learning model to adjust its internal parameters.

### Quantitative plant morphology

The description of plant morphological traits, for example, number of leaves, canopy cover, number of flowers, and seeds, provides a foundation to characterize plant phenotypic response, which is directly related to plant developmental stage, yield potential, and overall health (Kouressy et al., 2008). The quantification of agronomic traits often relies on manual measurements, which are costly, labor-intensive, and prone to errors. Several approaches including neural networks and other machine learning models have been published to perform leaf counting, area estimation, folding and plant growth stage classification, stem–leaf segmentation, and seed counting (Parmar et al., 2016; Pereira et al., 2016; Sodhi et al., 2017; Teimouri et al., 2018; Uzal et al., 2018; Jin et al., 2019; Rascio et al., 2020). Deep learning models are widely applied to image analysis due to the high complexity of the data and their potential for quantitative morphology lies partially in their capacity to segment the target object from the nontarget objects in the image. Hence, it is possible to measure the traits of the segmented object (number of seeds, color, fruit shape, fruit, or seed size). This measurement ability was shown in a study for fish morphology quantification that used Mask R-CNN for pixel-wise segmentation of the fish body followed by measurement of its morphological features (Yu et al., 2020). A variety of trait phenotyping datasets have been released to develop pipelines for trait measurement, such as the hypocotyl dataset with images of *A. thaliana* seedlings for length determination (Dobos et al., 2019), image time-series of *A. thaliana* growth that can be used to predict performance (Taghavi Namin et al., 2018), and species identification datasets (Kumar et al., 2012; Lee et al., 2015, 2017; Fricker et al., 2019; Zheng et al., 2019) as shown in Supplemental Data Set 5.

PlantCV and Deep Plant Phenomics are the two platforms that offer packaged pretrained deep learning models to run as applications for phenotyping (Fahlgren et al., 2015; Ubbens and Stavness, 2017). However, tools for quantitative morphology analysis can only guarantee performance if under restricted image conditions and may require further image processing steps. Producing and sharing annotated datasets from a diverse set of species are the most efficient way to ensure new tools can be developed to incorporate them. The Plant Phenotyping Datasets (Supplemental Data Set 5) are the collection of annotated top-view images of *A. thaliana* and tobacco (*Nicotiana tabacum*) undergoing different treatments (Minervini et al., 2016). It is a benchmark dataset (Box 1), that was employed in the leaf segmentation and leaf counting challenges at the Computer Vision Problems in Plant Phenotyping conference, and propelled the development of tools for leaf segmentation and counting (Aich and Stavness, 2017; Dobrescu et al., 2017; Giuffrida et al., 2018; Praveen Kumar and Domnic, 2020), which can be later used for assessing plant growth and biomass. Other datasets focused on seed and fruit organs are available. Some datasets are useful to compare variance in seed morphological traits (Ducournau et al., 2020), while others can be used for the development of computer vision tools for fruit counting and automatic quality assessment. In this category, there is a soybean image dataset to assess seed damage from mechanical and biological sources (Pereira et al., 2019), a dataset for the identification of Indian basmati rice (*Oryza sativa*) seed varieties (Sharma et al., 2020), sugar beet (*Beta vulgaris*) seed traits (Ducournau et al., 2020), a cocoa bean (*Theobroma cacao*) dataset for quality assessment (Santos et al., 2019), a banana (*Musa sp.*) tier abnormality classification (Piedad, 2019), and hyperspectral images of different loose tea (*Camellia sinensis*; Mishra, 2018; Supplemental Data Set 5).

Determining leaf inclination and distribution on the plant is an important morphological trait, it impacts the plant spectral reflectance and is a mechanism to increase tolerance to abiotic stress, with impacts on leaf temperature, water loss, and drought tolerance (Ehleringer and Comstock, 1987; Fuchs, 1990; He et al., 1996; Werner et al., 1999). In common bean (*Phaseolus vulgaris* L.) the extent of leaf movement increases as the water availability drops, allowing the plants to maintain leaf temperature despite stomata closure (Pastenes et al., 2005). A dataset for leaf angle estimation with ground-truth angles for 71 *Eucalyptus* species (Pisek and Adamson, 2020) is described in Supplemental Data Set 5, it contains images of *Eucalyptus* canopies that can be used to estimate leaf angle distribution in trees. Automated pipelines for leaf angle extraction have been developed and tested for *A. thaliana*, beet, apple (*Malus domestica*), maize, and sorghum (Müller-Linow et al., 2015; Kenchanmane Raju et al., 2020), allowing researchers to track leaf angle variability and distribution over time. Identifying varieties with desired leaf angle distribution can assist breeders to select the varieties best adapted to specific



environmental conditions, such as high planting densities where a narrow angle prevents the leaf from being shadowed by others (Pepper et al., 1977; Lambert and Johnson, 1978).

A multitask pipeline capable of phenotyping a comprehensive array of traits in different tissues would produce a snapshot that can be used to identify new QTLs. It was observed that genetic traits may contribute to different tissues causing multiple trait variance (Li et al., 2018). This would provide a resource to detect QTLs and improve our understanding of the genetic basis of complex phenotypes (Topp et al., 2013). Trait phenotyping can also be used for the construction of 3D representations of the plant structure (Topp et al., 2013; Vadez et al., 2015; van Dusschoten et al., 2016; McCormick et al., 2016; Bengochea-Guevara et al., 2017; Sodhi et al., 2017; Vázquez-Arellano et al., 2018; Wang et al., 2018b). This avoids loss of information caused by 2D compression and prevents the generation of artifacts that can occur due to lighting, occlusion, and overlaps.

## Concluding remarks

HTP platforms and tools are revolutionizing the way we capture plant phenotypic variation, by allowing the quantification of agronomic traits, and the identification of genetic traits with potential for crop breeding. Publishing the collected phenotypic datasets and associated information would help drive the development of high-performance crops, allowing growers to more effectively monitor their crops and giving breeders the opportunity to explore research from a new perspective with updated tools. The research community must adhere to standardized practices for dataset release such as proposed by MIAPPE in order for the datasets to be explored and interpreted (see “Outstanding questions”). Because of the multiple types of data comprising a HTP dataset, it is important that the terms are clearly defined so researchers from different fields (computer science, remote sensing, and plant biology) can collaborate. In cases where data sharing is unfeasible due to privacy or security concerns, federative learning offers an opportunity to train machine learning algorithms collaboratively without exchanging data. A variety of mathematical and machine learning methods have recently been applied to address the bottleneck of phenotypic quantitative analysis. However, without established benchmark datasets, it is difficult to compare the performance of these approaches, imposing a barrier to improvements and our understanding of the limitations of techniques. It is also important that novel tools are intuitive and well documented, allowing domain experts with minimal programming background to benefit (Klukas et al., 2014; Ubbens and Stavness, 2017). Plant phenotyping is a rapidly evolving field with a growing community, it is important that we use this growth to establish structures such as public repositories and benchmarks to support the field so it may achieve its potential to accelerate crop breeding.

## OUTSTANDING QUESTIONS

- What is the best approach to solve the high variability in HTP data collection and processing methodology? Should we define standard methodologies for these tasks or develop tools to detect variance?
- How can we collate sufficient benchmark datasets to evaluate tool performance? Are the current benchmarks capable of exposing limitations of the tools?
- How should authors be encouraged to release datasets with their publications, similar to what is required when publishing the results from analysis of genomic datasets? What structures are needed to support the release and maintenance of these datasets?
- How can we increase data interoperability to integrate datasets from multiple sources (genomic, environmental data)? What is the minimum metadata needed to ensure that?

## Supplemental data

The following materials are available in the online version of this article.

**Supplementary Data Set 1.** Available image-based HTP datasets for crop yield prediction.

**Supplementary Data Set 2.** Available image-based HTP datasets for abiotic stress phenotyping

**Supplementary Data Set 3.** Available image-based HTP datasets for disease and pest detection

**Supplementary Data Set 4.** Root phenotyping datasets

**Supplementary Data Set 5.** Other miscellaneous databases that may be useful for applications not discussed in this review.

## Funding

This work was supported by the Australian Government through the Australian Research Council (Projects DP200100762, DP1601004497, and LP140100537) and the Grains Research and Development Corporation (Projects 9177539 and 9177591) Benjamin J. Nestor is supported by a university postgraduate award at The University of Western Australia. Monica F. Danilevicz and Philipp E. Bayer received support from the Forrest Research Foundation. Monica F. Danilevicz and Benjamin J. Nestor are further supported by the Research Training Program scholarships.

*Conflict of interest statement.* The authors declare no competing interests.

## References

- Abdu AM, Mokji MM, Sheikh UU (2020) Automatic vegetable disease identification approach using individual lesion features. *Comput Electron Agric* **176**: 105660

- AgReFed** (2019) Agricultural Research Federation at Dale [Internet]. AgReFed @ Dale, [http://webapps.plantenergy.uwa.edu.au/agrefed\\_dale/](http://webapps.plantenergy.uwa.edu.au/agrefed_dale/)
- Aich S, Stavness I** (2017) Leaf counting with deep convolutional and deconvolutional networks. *In* 2017 IEEE International Conference on Computer Vision Workshops (ICCVW). IEEE, pp 2080–2089
- Ali S, Hodson D** (2017) Wheat rust surveillance: field disease scoring and sample collection for phenotyping and molecular genotyping. *Methods Mol Biol* **1659**: 3–11
- Anderson MC, Allen RG, Morse A, Kustas WP** (2012) Use of Landsat thermal imagery in monitoring evapotranspiration and managing water resources. *Remote Sens Environ* **122**: 50–65
- Aranguren M, Castellón A, Aizpurua A** (2020) Wheat yield estimation with NDVI values using a proximal sensing tool. *Remote Sens (Basel)* **12**: 2749
- Araus JL, Kefauver SC, Zaman-Allah M, Olsen MS, Cairns JE** (2018) Translating high-throughput phenotyping into genetic gain. *Trends Plant Sci* **23**: 451–466
- Arroyo JA, Gomez-Castaneda C, Ruiz E, Munoz de Cote E, Gavi F, Sucar LE** (2017) UAV technology and machine learning techniques applied to the yield improvement in precision agriculture. *In* 2017 IEEE Mexican Humanitarian Technology Conference (MHTC). IEEE, pp 137–143
- Arsenovic M, Karanovic M, Sladojevic S, Anderla A, Stefanovic D** (2019) Solving current limitations of deep learning based approaches for plant disease detection. *Symmetry* **11**: 939
- Atkinson JA, Lobet G, Noll M, Meyer PE, Griffiths M, Wells DM** (2017a) Combining semi-automated image analysis techniques with machine learning algorithms to accelerate large-scale genetic studies. *Gigascience* **6**: 1–7
- Atkinson JA, Lobet G, Noll M, Meyer PE, Griffiths M, Wells DM** (2017b) Supporting data for “Combining semi-automated image analysis techniques with machine learning algorithms to accelerate large scale genetic studies”. *GigaScience Database*. doi: 10.5524/100346
- Atkinson JA, Pound MP, Bennett MJ, Wells DM** (2019) Uncovering the hidden half of plants using new advances in root phenotyping. *Curr Opin Biotechnol* **55**: 1–8
- Backoulou GF, Elliott NC, Giles K, Phoofolo M, Catana V, Mirik M, Michels J** (2011) Spatially discriminating Russian wheat aphid induced plant stress from other wheat stressing factors. *Comput Electron Agric* **78**: 123–129
- Bah MD, Dericquebourg E, Hafiane A, Canals R** (2019) Deep learning based classification system for identifying weeds using high-resolution UAV imagery. *In* K Arai, S Kapoor, R Bhatia, eds, *Intelligent Computing: Proceedings of the 2018 Computing Conference*, Vol 2. Springer International Publishing, Cham, pp 176–187
- Bai G, Ge Y, Hussain W, Baenziger PS, Graef G** (2016) A multi-sensor system for high throughput field phenotyping in soybean and wheat breeding. *Comput Electron Agric* **128**: 181–192
- Baltrušaitis T, Ahuja C, Morency L** (2017) Multimodal machine learning: a survey and taxonomy. *IEEE Trans Pattern Anal Mach Intell* **41**: 423–443
- Baranoski GVG, Van Leeuwen S, Chen TF** (2016) On the decomposition of foliar hyperspectral signatures for the high-fidelity discrimination and monitoring of crops. *In* AM Larar, P Chauhan, M Suzuki, J Wang, eds, *Multispectral, Hyperspectral, and Ultraspectral Remote Sensing Technology, Techniques and Applications VI*. SPIE, p 98800G
- Bebber DP, Ramotowski MAT, Gurr SJ** (2013) Crop pests and pathogens move polewards in a warming world. *Nat Clim Change* **3**: 985–988
- Bell J, Dee HM** (2016) Aberystwyth leaf evaluation dataset. Zenodo. doi: 10.5281/zenodo.168158
- Bengochea-Guevara JM, Andújar D, Sanchez-Sardana FL, Cantuña K, Ribeiro A** (2017) A low-cost approach to automatically obtain accurate 3D models of woody crops. *Sensors* **18**: 30
- Bodner G, Nakhforoosh A, Arnold T, Leitner D** (2018) Hyperspectral imaging: a novel approach for plant root phenotyping. *Plant Methods* **14**: 84
- Boer R, Campbell LC, Fletcher DJ** (1993) Characteristics of frost in a major wheat-growing region of Australia. *Aust J Agric Res* **44**: 1731
- Bouché F, D’Aloia M, Tocquin P, Lobet G, Detry N, Périlleux C** (2016) Integrating roots into a whole plant network of flowering time genes in *Arabidopsis thaliana*. *Sci Rep* **6**: 29042
- Boyer JS** (1982) Plant productivity and environment. *Science* **218**: 443–448
- Bruning B, Berger B, Lewis M, Liu H, Garnett T** (2020) Approaches, applications, and future directions for hyperspectral vegetation studies: an emphasis on yield-limiting factors in wheat. *Plant Phenome J* **3**: e20007
- Bucksch A, BurrIDGE J, York LM, Das A, Nord E, Weitz JS, Lynch JP** (2014) Image-based high-throughput field phenotyping of crop roots. *Plant Physiol* **166**: 470–486
- Burnette M, Sagan V, Andrade-Sanchez P, Shakoob N, Sidike P, Ward R, LeBauer D, Kooper R, Maloney JD, Rohde GS, et al.** (2018) TERRA-REF data processing infrastructure. *In* *Proceedings of the Practice and Experience on Advanced Research Computing—PEARC’18*. ACM Press, New York, NY, USA, pp 1–7
- Busemeyer L, Mentrup D, Möller K, Wunder E, Alheit K, Hahn V, Maurer HP, Reif JC, Würschum T, Müller J, et al.** (2013) BreedVision—a multi-sensor platform for nondestructive field-based phenotyping in plant breeding. *Sensors* **13**: 2830–2847
- Busener N, Kengkanna J, Saengwilai PJ, Bucksch A** (2020) Image-based root phenotyping links root architecture to micronutrient concentration in cassava. *Plants People Planet* **2**: 678–687
- Buslaev A, Iglovikov VI, Khvedchenya E, Parinov A, Druzhinin M, Kalinin AA** (2020) Albumentations: fast and flexible image augmentations. *Information* **11**: 125
- Cammarano D, Ceccarelli S, Grando S, Romagosa I, Benbelkacem A, Akar T, Al-Yassin A, Pecchioni N, Francia E, Ronga D** (2019) The impact of climate change on barley yield in the Mediterranean basin. *Eur J Agron* **106**: 1–11
- Carvalho S, van der Putten WH, Hol WHG** (2016) The potential of hyperspectral patterns of winter wheat to detect changes in soil microbial community composition. *Front Plant Sci* **7**: 759
- Chitwood DH, Otoni WC** (2016) Morphometric analysis of *Passiflora* leaves: the relationship between landmarks of the vasculature and elliptical Fourier descriptors of the blade. *Gigascience* **6**: 1–13
- Chiu MT, Xu X, Wei Y, Huang Z, Schwing A, Brunner R, Khachatryan H, Karapetyan H, Dozier I, Rose G, et al.** (2020) Agriculture-vision: a large aerial image database for agricultural pattern analysis. 2020 IEEE/CVF Conference on Computer Vision and Pattern Recognition (CVPR). IEEE, pp 2825–2835
- Chopin J, Kumar P, Miklavcic SJ** (2018) Land-based crop phenotyping by image analysis: consistent canopy characterization from inconsistent field illumination. *Plant Methods* **14**: 39
- Chouhan SS, Singh UP, Kaul A, Jain S** (2019) A data repository of leaf images: practice towards plant conservation with plant pathology. *In* 2019 4th International Conference on Information Systems and Computer Networks (ISCON). IEEE, pp 700–707
- Clark RT, MacCurdy RB, Jung JK, Shaff JE, McCouch SR, Aneshansley DJ, Kochian LV** (2011) Three-dimensional root phenotyping with a novel imaging and software platform. *Plant Physiol* **156**: 455–465
- Colombi T, Kirchgessner N, Le Marié CA, York LM, Lynch JP, Hund A** (2015) Next generation shovelomics: set up a tent and REST. *Plant Soil* **388**: 1–20
- Conaty WC, Mahan JR, Neilsen JE, Tan DKY, Yeates SJ, Sutton BG** (2015) The relationship between cotton canopy temperature and yield, fibre quality and water-use efficiency. *Field Crops Res* **183**: 329–341

- Corona-Lopez DDJ, Sommer S, Rolfe SA, Podd F, Grieve BD** (2019) Electrical impedance tomography as a tool for phenotyping plant roots. *Plant Methods* **15**: 49
- Danzi D, Briglia N, Petrozza A, Summerer S, Povero G, Stivaletta A, Cellini F, Pignone D, De Paola D, Janni M** (2019) Can high throughput phenotyping help food security in the mediterranean area? *Front Plant Sci* **10**: 15
- Das A, Schneider H, Burrige J, Ascanio AKM, Wojciechowski T, Topp CN, Lynch JP, Weitz JS, Bucksch A** (2015) Digital imaging of root traits (DIRT): a high-throughput computing and collaboration platform for field-based root phenomics. *Plant Methods* **11**: 51
- David E, Madec S, Sadeghi-Tehran P, Aasen H, Zheng B, Liu S, Kirchgessner N, Ishikawa G, Nagasawa K, Badhon MA, et al.** (2020) Global wheat head detection (GWHHD) dataset: a large and diverse dataset of high-resolution RGB-labelled images to develop and benchmark wheat head detection methods. *Plant Phenomics* **2020**: 1–12
- Diaz L, Herrero J** (1992) Salinity estimates in irrigated soils using electromagnetic induction. *Soil Sci* **154**: 151–157
- Dobos O, Horvath P, Nagy F, Danka T, Viczián A** (2019) A deep learning-based approach for high-throughput hypocotyl phenotyping. *Plant Physiol* **181**: 1415–1424
- Dobrescu A, Giuffrida MV, Tsaftaris SA** (2017) Leveraging multiple datasets for deep leaf counting. *In* 2017 IEEE International Conference on Computer Vision Workshops (ICCVW). IEEE, pp 2072–2079
- Dos Santos Ferreira A** (2017) Data for: weed detection in soybean crops using ConvNets. *Comput Electron Agric* **143**: 314–324
- Ducournau S, Charrier A, Demilly D, Wagner M-H, Trigui G, Dupont A, Hamdy S, Boudehri-Giresse K, Le Corre L, Landais L, et al.** (2020) High throughput phenotyping dataset related to seed and seedling traits of sugar beet genotypes. *Data Brief* **29**: 105201
- van Dusschoten D, Metzner R, Kochs J, Postma JA, Pflugfelder D, Bühler J, Schurr U, Jahnke S** (2016) Quantitative 3D analysis of plant roots growing in soil using magnetic resonance imaging. *Plant Physiol* **170**: 1176–1188
- van Eeuwijk FA, Bustos-Korts D, Millet EJ, Boer MP, Kruijer W, Thompson A, Malosetti M, Iwata H, Quiroz R, Kuppe C, et al.** (2019) Modeling strategies for assessing and increasing the effectiveness of new phenotyping techniques in plant breeding. *Plant Sci* **282**: 23–39
- Ehleringer JR, Comstock J** (1987) Leaf absorptance and leaf angle: mechanisms for stress avoidance. *In* JD Tenhunen, FM Catarino, OL Lange, WC Oechel, eds, *Plant Response to Stress*. Springer, Berlin, Heidelberg, pp 55–76
- El-Hendawy SE, Al-Suhaibani NA, Hassan WM, Dewir YH, Elsayed S, Al-Ashkar I, Abdella KA, Schmidhalter U** (2019) Evaluation of wavelengths and spectral reflectance indices for high-throughput assessment of growth, water relations and ion contents of wheat irrigated with saline water. *Agric Water Manag* **212**: 358–377
- El Abidine MZ, Merdinoglu-Wiedemann S, Rasti P, Dutagaci H, Rousseau D** (2020) Machine learning-based classification of powdery mildew severity on melon leaves. *In* A El Moataz, D Mammass, A Mansouri, F Nouboud, eds, *Image and Signal Processing: 9th International Conference, ICISP 2020, Marrakesh, Morocco, 4–6 June 2020*, Proceedings. Springer International Publishing, Cham, pp 74–81
- Esgario JGM, Krohling RA, Ventura JA** (2020) Deep learning for classification and severity estimation of coffee leaf biotic stress. *Comput Electron Agric* **169**: 105162
- Fahlgren N, Feldman M, Gehan MA, Wilson MS, Shyu C, Bryant DW, Hill ST, McEntee CJ, Warnasooriya SN, Kumar I, et al.** (2015) A versatile phenotyping system and analytics platform reveals diverse temporal responses to water availability in setaria. *Mol Plant* **8**: 1520–1535
- Falk KG, Jubery TZ, Mirnezami SV, Parmley KA, Sarkar S, Singh A, Ganapathysubramanian B, Singh AK** (2020) Computer vision and machine learning enabled soybean root phenotyping pipeline. *Plant Methods* **16**: 5
- Fernandez-Gallego JA, Kefauver SC, Gutiérrez NA, Nieto-Taladriz MT, Araus JL** (2018) Wheat ear counting in-field conditions: high throughput and low-cost approach using RGB images. *Plant Methods* **14**: 22
- Ficke A, Cowger C, Bergstrom G, Brodal G** (2018) Understanding yield loss and pathogen biology to improve disease management: Septoria Nodorum blotch – a case study in wheat. *Plant Dis* **102**: 696–707
- Fischer RA, Rees D, Sayre KD, Lu ZM, Condon AG, Saavedra AL** (1998) Wheat yield progress associated with higher stomatal conductance and photosynthetic rate, and cooler canopies. *Crop Sci* **38**: 1467
- Fisher JB, Lee B, Purdy AJ, Halverson GH, Dohlen MB, Cawse-Nicholson K, Wang A, Anderson RG, Aragon B, Arain MA, et al.** (2020) ECOSTRESS: NASA's next generation mission to measure evapotranspiration from the International Space Station. *Water Resour Res* **56**: e2019WR026058
- Fitzgerald GJ, Perry EM, Flower KC, Callow JN, Boruff B, Delahunty A, Wallace A, Nuttall J** (2019) Frost damage assessment in wheat using spectral mixture analysis. *Remote Sens (Basel)* **11**: 2476
- Frantzeskakis L, Di Pietro A, Rep M, Schirawski J, Wu C-H, Panstruga R** (2020) Rapid evolution in plant-microbe interactions – a molecular genomics perspective. *New Phytol* **225**: 1134–1142
- Frederiks TM, Christopher JT, Harvey GL, Sutherland MW, Borrell AK** (2012) Current and emerging screening methods to identify post-head-emergence frost adaptation in wheat and barley. *J Exp Bot* **63**: 5405–5416
- Fricker GA, Ventura JD, Wolf J, North MP, Davis FW, Franklin J** (2019) A convolutional Neural Network classifier identifies tree species in mixed-conifer forest from hyperspectral imagery. *Zenodo* **11**: 2326
- Fuchs M** (1990) Infrared measurement of canopy temperature and detection of plant water stress. *Theor Appl Climatol* **42**: 253–261
- Furbank RT, Tester M** (2011) Phenomics—technologies to relieve the phenotyping bottleneck. *Trends Plant Sci* **16**: 635–644
- Galkovskiy T, Mileyko Y, Bucksch A, Moore B, Symonova O, Price CA, Topp CN, Iyer-Pascuzzi AS, Zurek PR, Fang S, et al.** (2012) GiA roots: software for the high throughput analysis of plant root system architecture. *BMC Plant Biol* **12**: 116
- Garbout A, Munkholm LJ, Hansen SB, Petersen BM, Munk OL, Pajor R** (2012) The use of PET/CT scanning technique for 3D visualization and quantification of real-time soil/plant interactions. *Plant Soil* **352**: 113–127
- Garrett KA** (2013) Big data insights into pest spread. *Nat Clim Change* **3**: 955–957
- Gašparović M, Zrinjski M, Barković D, Radočaj D** (2020) An automatic method for weed mapping in oat fields based on UAV imagery. *Comput Electron Agric* **173**: 105385
- Gautam A, Sai Prasad SV, Jajoo A, Ambati D** (2015) Canopy temperature as a selection parameter for grain yield and its components in durum wheat under terminal heat stress in late sown conditions. *Agric Res* **4**: 238–244
- Giovannetti M, Goeschl C, Dietzen C, Andersen SU, Kopriva S, Busch W** (2019) Identification of novel genes involved in phosphate accumulation in *Lotus japonicus* through Genome Wide Association mapping of root system architecture and anion content. *PLOS Genet* **15**: e1008126
- Giselsso TM, Jørgensen RN, Jensen PK, Dyrmann M, Midtby HS** (2017) A public image database for benchmark of plant seedling classification algorithms. *CoRR abs/1711.05458*
- Giuffrida MV, Doerner P, Tsaftaris SA** (2018) Pheno-Deep Counter: a unified and versatile deep learning architecture for leaf counting. *Plant J* **96**: 880–890

- Golicz AA, Bayer PE, Barker GC, Edger PP, Kim H, Martinez PA, Chan CKK, Severn-Ellis A, McCombie WR, Parkin IAP, et al.** (2016) The pangenome of an agronomically important crop plant *Brassica oleracea*. *Nat Commun* **7**: 13390
- Gracia-Romero A, Kefauver SC, Fernandez-Gallego JA, Vergara-Diaz O, Nieto-Taladriz MT, Araus JL** (2019) UAV and ground image-based phenotyping: a proof of concept with durum wheat. *Remote Sens (Basel)* **11**: 1244
- Granier C, Aguirrezabal L, Chenu K, Cookson SJ, Dauzat M, Hamard P, Thioux J-J, Rolland G, Bouchier-Combaud S, Lebaudy A, et al.** (2006) PHENOPSIS, an automated platform for reproducible phenotyping of plant responses to soil water deficit in *Arabidopsis thaliana* permitted the identification of an accession with low sensitivity to soil water deficit. *New Phytol* **169**: 623–635
- Griffiths M, Roy S, Guo H, Seethepalli A, Huhman D, Ge Y, Sharp RE, Fritschi FB, York LM** (2020) A multiple ion-uptake phenotyping platform reveals shared mechanisms that affect nutrient uptake by maize roots. *Plant Physiol* **185**: 781–795
- Hamberg LJ, Fraser RA, Robinson DT, Trant AJ, Murphy SD** (2020) Surface temperature as an indicator of plant species diversity and restoration in oak woodland. *Ecol Indic* **113**: 106249
- Hamzeh S, Naseri AA, AlaviPanah SK, Mojaradi B, Bartholomeus HM, Clevers JGPW, Behzad M** (2013) Estimating salinity stress in sugarcane fields with spaceborne hyperspectral vegetation indices. *Int J Appl Earth Obs Geoinf* **21**: 282–290
- Hani N, Roy P, Isler V** (2020) Minneapple: a benchmark dataset for apple detection and segmentation. *IEEE Robot Autom Lett* **5**: 852–858
- Hank T, Bach H, Mauser W** (2015) Using a remote sensing-supported hydro-agroecological model for field-scale simulation of heterogeneous crop growth and yield: application for wheat in Central Europe. *Remote Sens (Basel)* **7**: 3934–3965
- Hargreaves CE, Gregory PJ, Bengough AG** (2009) Measuring root traits in barley (*Hordeum vulgare* ssp. *vulgare* and ssp. *spontaneum*) seedlings using gel chambers, soil sacs and X-ray microtomography. *Plant Soil* **316**: 285–297
- Hasan RI, Yusuf SM, Alzubaidi L** (2020) Review of the state of the art of deep learning for plant diseases: a broad analysis and discussion. *Plants* **9**: 1302
- Haug S, Ostermann J** (2015) A crop/weed field image dataset for the evaluation of computer vision based precision agriculture tasks. In L Agapito, MM Bronstein, C Rother, eds, *Computer Vision - ECCV 2014 Workshops: Zurich, Switzerland, 6–7 and 12 September 2014, Proceedings, Part IV*. Springer International Publishing, Cham, pp 105–116
- He J, Chee CW, Goh CJ** (1996) "Photoinhibition" of *Heliconia* under natural tropical conditions: the importance of leaf orientation for light interception and leaf temperature. *Plant Cell Environ* **19**: 1238–1248
- He K, Zhang X, Ren S, Sun J** (2016) Deep residual learning for image recognition. In *IEEE Conference on Computer Vision and Pattern Recognition (CVPR)*. IEEE, pp 770–778
- Hirsch CN, Foerster JM, Johnson JM, Sekhon RS, Muttoni G, Vaillancourt B, Peñagaricano F, Lindquist E, Pedraza MA, Barry K, et al.** (2014) Insights into the maize pan-genome and pan-transcriptome. *Plant Cell* **26**: 121–135
- Holman F, Riche A, Michalski A, Castle M, Wooster M, Hawkesford M** (2016) High throughput field phenotyping of wheat plant height and growth rate in field plot trials using UAV based remote sensing. *Remote Sens (Basel)* **8**: 1031
- Hol WHG, Carvalho S, Van Der Putten WH, Hol WHG** (2017) Data from: the potential of hyperspectral patterns of winter wheat to detect changes in soil microbial community composition. *Dryad* doi: 10.5061/dryad.j430t
- Hou M, Tian F, Zhang T, Huang M** (2019) Evaluation of canopy temperature depression, transpiration, and canopy greenness in relation to yield of soybean at reproductive stage based on remote sensing imagery. *Agric Water Manag* **222**: 182–192
- Hovmöller MS, Yahyaoui AH, Milus EA, Justesen AF** (2008) Rapid global spread of two aggressive strains of a wheat rust fungus. *Mol Ecol* **17**: 3818–3826
- Huang L, Shea AL, Qian H, Masurkar A, Deng H, Liu D** (2019). Patient clustering improves efficiency of federated machine learning to predict mortality and hospital stay time using distributed electronic medical records. *J Biomed Inform* **99**: 103291.
- Hübner S, Bercovich N, Todesco M, Mandel JR, Odenheimer J, Ziegler E, Lee JS, Baute GJ, Owens GL, Grassa CJ, et al.** (2019) Sunflower pan-genome analysis shows that hybridization altered gene content and disease resistance. *Nat Plants* **5**: 54–62
- Hunter JE, Gannon TW, Richardson RJ, Yelverton FH, Leon RG** (2020) Integration of remote-weed mapping and an autonomous spraying unmanned aerial vehicle for site-specific weed management. *Pest Manag Sci* **76**: 1386–1392
- Hunt CH, Hayes BJ, van Eeuwijk FA, Mace ES, Jordan DR** (2020) Multi-environment analysis of sorghum breeding trials using additive and dominance genomic relationships. *Theor Appl Genet* **133**: 1009–1018
- Irons JR, Dwyer JL, Barsi JA** (2012) The next Landsat satellite: the Landsat data continuity mission. *Remote Sens Environ* **122**: 11–21
- Iyer-Pascuzzi AS, Symonova O, Mileyko Y, Hao Y, Belcher H, Harer J, Weitz JS, Benfey PN** (2010) Imaging and analysis platform for automatic phenotyping and trait ranking of plant root systems. *Plant Physiol* **152**: 1148–1157
- Jahnke S, Menzel MI, van Dusschoten D, Roeb GW, Bühler J, Minwuyet S, Blümler P, Temperton VM, Hombach T, Streun M, et al.** (2009) Combined MRI-PET dissects dynamic changes in plant structures and functions. *Plant J* **59**: 634–644
- Janssen SJC, Porter CH, Moore AD, Athanasiadis IN, Foster I, Jones JW, Antle JM** (2017) Toward a new generation of agricultural system data, models and knowledge products: information and communication technology. *Agric Syst* **155**: 200–212
- Jiang N, Floro E, Bray AL, Laws B, Duncan KE, Topp CN** (2019) Three-dimensional time-lapse analysis reveals multiscale relationships in maize root systems with contrasting architectures. *Plant Cell* **31**: 1708–1722
- Jin J, Jiang H, Zhang X, Wang Y, Song X** (2013) Detecting the responses of *Masson pine* to acid stress using hyperspectral and multispectral remote sensing. *Int J Remote Sens* **34**: 7340–7355
- Jin S, Su Y, Wu F, Pang S, Gao S, Hu T, Liu J, Guo Q** (2019) Stem-leaf segmentation and phenotypic trait extraction of individual maize using terrestrial lidar data. *IEEE Trans Geosci Remote Sens* **57**: 1336–1346
- Joalland S, Screpanti C, Liebisch F, Varella HV, Gaume A, Walter A** (2017) Comparison of visible imaging, thermography and spectrometry methods to evaluate the effect of *Heterodera schachtii* inoculation on sugar beets. *Plant Methods* **13**: 73
- Juliana P, Singh RP, Poland J, Mondal S, Crossa J, Montesinos-López OA, Dreisigacker S, Pérez-Rodríguez P, Huerta-Espino J, Crespo-Herrera L, et al.** (2018) Prospects and challenges of applied genomic selection—a new paradigm in breeding for grain yield in bread wheat. *Plant Genome*. doi: 10.3835/plantgenome2018.03.0017
- Karlekar A, Seal A** (2020) SoyNet: soybean leaf diseases classification. *Comput Electron Agric* **172**: 105342
- Kenchanmane Raju SK, Adkins M, Enersen A, Santana de Carvalho D, Studer AJ, Ganapathysubramanian B, Schnable PS, Schnable JC** (2020) Leaf Angle eXtractor: a high-throughput image processing framework for leaf angle measurements in maize and sorghum. *Appl Plant Sci* **8**: e11385
- Kerkech M, Hafiane A, Canals R** (2020) Vine disease detection in UAV multispectral images using optimized image registration and deep learning segmentation approach. *Comput Electron Agric* **174**: 105446

- Khanna R, Schmid L, Walter A, Nieto J, Siegwart R, Liebisch F** (2019) A spatio temporal spectral framework for plant stress phenotyping. *Plant Methods* **15**: 13
- Kirchgessner N, Liebisch F, Yu K, Pfeifer J, Friedli M, Hund A, Walter A** (2016) The ETH field phenotyping platform FIP: a cable-suspended multi-sensor system. *Funct Plant Biol* **44**: 154–168
- Klukas C, Chen D, Pape J-M** (2014) Integrated analysis platform: an open-source information system for high-throughput plant phenotyping. *Plant Physiol* **165**: 506–518
- Konečný J., McMahan H.B., Ramage D., Richtárik P.,** (2016) Federated optimization: distributed machine learning for on-device intelligence. *CoRR abs/1610.02527*
- Kouressy M, Dingkuhn M, Vaksman M, Clément-Vidal A, Chantreau J** (2008) Potential contribution of dwarf and leaf longevity traits to yield improvement in photoperiod sensitive sorghum. *Eur J Agron* **28**: 195–209
- Krajewski P, Chen D, Cwiek H, van Dijk ADJ, Fiorani F, Kersey P, Klukas C, Lange M, Markiewicz A, Nap JP, et al.** (2015) Toward recommendations for metadata and data handling in plant phenotyping. *J Exp Bot* **66**: 5417–5427
- Krohling RA** (2019) BRACOL – a Brazilian Arabica Coffee Leaf images dataset to identification and quantification of coffee diseases and pests. Mendeley doi: 10.17632/yy2k5y8mxg.1
- Kumar M, Govindasamy V, Rane J, Singh AK, Choudhary RL, Raina SK, George P, Aher LK, Singh NP** (2017) Canopy temperature depression (CTD) and canopy greenness associated with variation in seed yield of soybean genotypes grown in semi-arid environment. *S Afr J Bot* **113**: 230–238
- Kumar N, Adeloye AJ, Shankar V, Rustum R** (2020) Neural computing modeling of the crop water stress index. *Agric Water Manag* **239**: 106259
- Kumar N, Belhumeur PN, Biswas A, Jacobs DW, Kress WJ, Lopez IC, Soares JVB** (2012) Leafsnap: a computer vision system for automatic plant species identification. In A Fitzgibbon, S Lazebnik, P Perona, Y Sato, C Schmid, eds, *Computer Vision – ECCV 2012*. Springer, Berlin Heidelberg, pp 502–516
- Kusrini K, Suputa S, Setyanto A, Agastya IMA, Priantoro H, Chandramouli K, Izquierdo E** (2020a) Dataset for pest classification in Mango farms from Indonesia. Mendeley doi: 10.17632/94jf97jzc8.1
- Kusrini K, Suputa S, Setyanto A, Agastya IMA, Priantoro H, Chandramouli K, Izquierdo E** (2020b) Data augmentation for automated pest classification in Mango farms. *Comput Electron Agric* **179**: 105842
- Lambert RJ, Johnson RR** (1978) Leaf angle, tassel morphology, and the performance of maize hybrids1. *Crop Sci* **18**: 499
- LeBauer, D., Kooper, R., Burnette, M., Willis, C.** (2017) TERRA REF: advancing phenomics with high resolution, open access sensor and genomics data. AGU Fall Meeting Abstracts
- LeCun Y, Bengio Y, Hinton G** (2015) Deep learning. *Nature* **521**: 436–444
- Lee J, Sun J, Wang F, Wang S, Jun C H, Jiang X** (2018). Privacy-preserving patient similarity learning in a federated environment: development and analysis. *JMIR Med Inform* **6**(2), e20
- Lee SH, Chan CS, Mayo SJ, Remagnino P** (2017) How deep learning extracts and learns leaf features for plant classification. *Pattern Recognit* **71**: 1–13
- Lee SH, Chan CS, Wilkin P, Remagnino P** (2015) Deep-plant: plant identification with convolutional neural networks. In 2015 IEEE International Conference on Image Processing (ICIP). IEEE, pp 452–456
- Liu M, Liu X, Ding W, Wu L** (2011) Monitoring stress levels on rice with heavy metal pollution from hyperspectral reflectance data using wavelet-fractal analysis. *Int J Appl Earth Obs Geoinf* **13**: 246–255
- Li L, Zhang Q, Huang D** (2014) A review of imaging techniques for plant phenotyping. *Sensors* **14**: 20078–20111
- Li M, Frank MH, Coneva V, Mio W, Chitwood DH, Topp CN** (2018) The persistent homology mathematical framework provides enhanced genotype-to-phenotype associations for plant morphology. *Plant Physiol* **177**: 1382–1395
- Li X, Liu X, Liu M, Wang C, Xia X** (2015) A hyperspectral index sensitive to subtle changes in the canopy chlorophyll content under arsenic stress. *Int J Appl Earth Obs Geoinf* **36**: 41–53
- Lobet G** (2017) Image analysis in plant sciences: publish then perish. *Trends Plant Sci* **22**: 559–566
- Lobet G, Draye X, Périlleux C** (2013) An online database for plant image analysis software tools. *Plant Methods* **9**: 38
- Lobet G, Koevoets IT, Noll M, Meyer PE, Tocquin P, Pagès L, Périlleux C** (2017) Using a structural root system model to evaluate and improve the accuracy of root image analysis pipelines. *Front Plant Sci* **8**: 447
- Lynch JP** (2007) Roots of the second green revolution. *Aust J Bot* **55**: 493
- Maimaitjiang M, Sagan V, Sidike P, Hartling S, Esposito F, Fritschi FB** (2020) Soybean yield prediction from UAV using multimodal data fusion and deep learning. *Remote Sens Environ* **237**: 111599
- Mariette N, Androdias A, Mabon R, Corbière R, Marquer B, Montarry J, Andrivon D** (2016) Local adaptation to temperature in populations and clonal lineages of the Irish potato famine pathogen *Phytophthora infestans*. *Ecol Evol* **6**: 6320–6331
- Martino DL, Abbate PE** (2019) Frost damage on grain number in wheat at different spike developmental stages and its modelling. *Eur J Agron* **103**: 13–23
- Mary B** (2018) Data and results for manuscript “Small scale characterization of vine plant root water uptake via 3D electrical resistivity tomography and Mise-À-La-Masse Method”. Zenodo doi: 10.5281/zenodo.1464825
- Mary B, Peruzzo L, Boaga J, Schmutz M, Wu Y, Hubbard SS, Cassiani G** (2018) Small-scale characterization of vine plant root water uptake via 3-D electrical resistivity tomography and mise-à-la-masse method. *Hydrol Earth Syst Sci* **22**: 5427–5444
- Marzougui A, Ma Y, Zhang C, McGee RJ, Coyne CJ, Main D, Sankaran S** (2019) Advanced imaging for quantitative evaluation of aphanomyces root rot resistance in lentil. *Front Plant Sci* **10**: 383
- Masina M, Lambertini A, Daprà I, Mandanici E, Lamberti A** (2020) Remote sensing analysis of surface temperature from heterogeneous data in a maize field and related water stress. *Remote Sens (Basel)* **12**: 2506
- Mattupalli C, Seethepalli A, York LM, Young CA** (2019) Digital imaging to evaluate root system architectural changes associated with soil biotic factors. *Phytobiomes J* **3**: 102–111
- Ma L, Shi Y, Siemianowski O, Yuan B, Egner TK, Mirnezami SV, Lind KR, Ganapathysubramanian B, Venditti V, Cademartiri L** (2019) Hydrogel-based transparent soils for root phenotyping in vivo. *Proc Natl Acad Sci U S A* **116**: 11063–11068
- McCormick RF, Truong SK, Mullet JE** (2016) 3D sorghum reconstructions from depth images identify QTL regulating shoot architecture. *Plant Physiol* **172**: 823–834
- McFarland BA, AlKhalifah N, Bohn M, Bubert J, Buckler ES, Ciampitti I, Edwards J, Ertl D, Gage JL, Falcon CM, et al.** (2020) Maize genomes to fields (G2F): 2014–2017 field seasons: genotype, phenotype, climatic, soil, and inbred ear image datasets. *BMC Res Notes* **13**: 71
- McKay Fletcher DM, Ruiz S, Dias T, Petroselli C, Roose T** (2020) Linking root structure to functionality: the impact of root system architecture on citrate-enhanced phosphate uptake. *New Phytol* **227**: 376–391
- Meerdink SK, Hook SJ, Roberts DA, Abbott EA** (2019) The ECOSTRESS spectral library version 1.0. *Remote Sens Environ* **230**: 111196
- Minervini M, Fischbach A, Scharr H, Tsafaris SA** (2016) Finely-grained annotated datasets for image-based plant phenotyping. *Pattern Recognit Lett* **81**: 80–89

- Minervini M, Fischbach A, Scharr H, Tsaftaris SA** (2015) Plant Phenotyping Datasets. <http://www.plant-phenotyping.org/datasets> (November 20, 2020)
- Mir RR, Reynolds M, Pinto F, Khan MA, Bhat MA** (2019) High-throughput phenotyping for crop improvement in the genomics era. *Plant Sci* **282**: 60–72
- Miralles DG, Teuling AJ, van Heerwaarden CC, Vilà-Guerau de Arellano J** (2014) Mega-heatwave temperatures due to combined soil desiccation and atmospheric heat accumulation. *Nat Geosci* **7**: 345–349
- Mishra P** (2018) Hyperspectral Images of Tea. University of Strathclyde doi: 10.15129/9d047066-4de1-4fa7-a763-625bfd102f30
- Mishra P, Karami A, Nordon A, Rutledge DN, Roger J-M** (2019) Automatic de-noising of close-range hyperspectral images with a wavelength-specific shearlet-based image noise reduction method. *Sens Actuators B Chem* **281**: 1034–1044
- Moghadam P, Ward D, Goan E, Jayawardena S, Sikka P, Hernandez E** (2017) Plant disease detection using hyperspectral imaging. In 2017 International Conference on Digital Image Computing: Techniques and Applications (DICTA). IEEE, pp 1–8
- Moghimi A, Yang C, Miller ME, Kianian SF, Marchetto PM** (2018) A novel approach to assess salt stress tolerance in wheat using hyperspectral imaging. *Front Plant Sci* **9**: 1182
- Mohanty S** (2016) GitHub - spMohanty/PlantVillage-Dataset: dataset of diseased plant leaf images and corresponding labels. <https://github.com/spMohanty/PlantVillage-Dataset> (November 30, 2020)
- Montesinos-López OA, Montesinos-López A, Crossa J, Gianola D, Hernández-Suárez CM, Martín-Vallejo J** (2018) Multi-trait, multi-environment deep learning modeling for genomic-enabled prediction of plant traits. *G3 (Bethesda)* **8**: 3829–3840
- Mooney SJ, Pridmore TP, Helliwell J, Bennett MJ** (2012) Developing X-ray computed tomography to noninvasively image 3-D root systems architecture in soil. *Plant Soil* **352**: 1–22
- Moriya ÉAS, Imai NN, Tommaselli AMG, Berveglieri A, Honkavaara E, Soares MA, Marino M** (2019) Detecting citrus huanglongbing in Brazilian orchards using hyperspectral aerial images. *Int Arch Photogramm Remote Sens Spatial Inf Sci XLII-2/W13*: 1881–1886
- Müller-Linow M, Pinto-Espinosa F, Scharr H, Rascher U** (2015) The leaf angle distribution of natural plant populations: assessing the canopy with a novel software tool. *Plant Methods* **11**: 11
- Murphy ME, Boruff B, Callow JN, Flower KC** (2020) Detecting frost stress in wheat: a controlled environment hyperspectral study on wheat plant components and implications for multispectral field sensing. *Remote Sens (Basel)* **12**: 477
- Nabity PD, Haus MJ, Berenbaum MR, DeLucia EH** (2013) Leaf-galling phyloxera on grapes reprograms host metabolism and morphology. *Proc Natl Acad Sci U S A* **110**: 16663–16668
- Nagasubramanian K, Jones S, Sarkar S, Singh AK, Singh A, Ganapathysubramanian B** (2018) Hyperspectral band selection using genetic algorithm and support vector machines for early identification of charcoal rot disease in soybean stems. *Plant Methods* **14**: 86
- Naito H, Ogawa S, Valencia MO, Mohri H, Urano Y, Hosoi F, Shimizu Y, Chavez AL, Ishitani M, Selvaraj MG, et al.** (2017) Estimating rice yield related traits and quantitative trait loci analysis under different nitrogen treatments using a simple tower-based field phenotyping system with modified single-lens reflex cameras. *ISPRS J Photogramm Remote Sens* **125**: 50–62
- Nakatumba-Nabende J, Akera B, Tusubira JF, Nsumba S, Mwebaze E** (2020) A dataset of necrotized cassava root cross-section images. *Data Brief* **32**: 106170
- Navavuori P, Narra N, Lipping T** (2019) Crop yield prediction with deep convolutional neural networks. *Comput Electron Agric* **163**: 104859
- Nhamo L, Ebrahim GY, Mabhaudhi T, Mpandeli S, Magombeyi M, Chitakira M, Magidi J, Sibanda M** (2020) An assessment of groundwater use in irrigated agriculture using multi-spectral remote sensing. *Phys Chem Earth* **115**: 102810
- Nouri M, Gorretta N, Vaysse P, Giraud M, Germain C, Keresztes B, Roger J-M** (2018) Near infrared hyperspectral dataset of healthy and infected apple tree leaves images for the early detection of apple scab disease. *Data Brief* **16**: 967–971
- Nuttall JG, Perry EM, Delahunty AJ, O’Leary GJ, Barlow KM, Wallace AJ** (2019) Frost response in wheat and early detection using proximal sensors. *J Agro Crop Sci* **205**: 220–234
- O’Neal ME, Landis DA, Isaacs R** (2002) An inexpensive, accurate method for measuring leaf area and defoliation through digital image analysis. *J Econ Entomol* **95**: 1190–1194
- Pacumbaba RO, Beyl CA** (2011) Changes in hyperspectral reflectance signatures of lettuce leaves in response to macronutrient deficiencies. *Adv Space Res* **48**: 32–42
- Pallottino F, Menesatti P, Figorilli S, Antonucci F, Tomasone R, Colantoni A, Costa C** (2018) Machine vision retrofit system for mechanical weed control in precision agriculture applications. *Sustainability* **10**: 2209
- Papoutsoglou EA, Faria D, Arend D, Arnaud E, Athanasiadis IN, Chaves I, Coppens F, Cornut G, Costa BV, Cwiek-Kupczyńska H, et al.** (2020) Enabling reusability of plant phenomic datasets with MIAPPE 1.1. *New Phytol* **227**: 260–273
- Parmar DK, Ghodasara YR, Patel KP, Patel KV, Kathiriya DR, Patel HK** (2016) Analysis of plant leaf area using Java image processing techniques - scaling and non scaling. *Ecol Environ Conserv* **22**: 763–766
- Parraga-Alava J** (2019) RoCoLe: a robusta coffee leaf images dataset. Mendeley doi: 10.17632/c5yvn32dzzg.2
- Parraga-Alava J, Cusme K, Loor A, Santander E** (2019) RoCoLe: a robusta coffee leaf images dataset for evaluation of machine learning based methods in plant diseases recognition. *Data Brief* **25**: 104414
- Partel V, Charan Kakarla S, Ampatzidis Y** (2019) Development and evaluation of a low-cost and smart technology for precision weed management utilizing artificial intelligence. *Comput Electron Agric* **157**: 339–350
- Pastenes C, Pimentel P, Lillo J** (2005) Leaf movements and photoinhibition in relation to water stress in field-grown beans. *J Exp Bot* **56**: 425–433
- Pepper GE, Pearce RB, Mock JJ** (1977) Leaf orientation and yield of maize1. *Crop Sci* **17**: 883–886
- Pereira DF, Bugatti PH, Lopes FM, Souza ALSM, Saito PTM** (2019) Contributing to agriculture by using soybean seed data from the tetrazolium test. *Data Brief* **23**: 103652
- Pereira DF, Saito PTM, Bugatti PH** (2016) An image analysis framework for effective classification of seed damages. In Proceedings of the 31st Annual ACM Symposium on Applied Computing - SAC’16. ACM Press, New York, New York, USA, pp 61–66
- Pflugfelder D, Metzner R, van Dusschoten D, Reichel R, Jahnke S, Koller R** (2017) Noninvasive imaging of plant roots in different soils using magnetic resonance imaging (MRI). *Plant Methods* **13**: 102
- Piedad E** (2019) Data for deep learning for noninvasive classification of clustered horticultural—a case for banana fruit tiers. Mendeley doi: 10.17632/xpz3d7jhbp.1
- Pisek J, Adamson K** (2020) Dataset of leaf inclination angles for 71 different Eucalyptus species. *Data Brief* **33**: 106391
- Pound MP, Atkinson JA, Townsend AJ, Wilson MH, Griffiths M, Jackson AS, Bulat A, Tzimiropoulos G, Wells DM, Murchie EH, et al.** (2017a) Deep machine learning provides state-of-the-art performance in image-based plant phenotyping. *Gigascience* **6**: 1–10
- Pound MP, Atkinson JA, Wells DM, Pridmore TP, French AP** (2017b) Deep learning for multi-task plant phenotyping. In Proceedings of the IEEE International Conference on Computer Vision Workshops, pp 2055–2063
- Praveen Kumar J, Domnic S** (2020) Rosette plant segmentation with leaf count using orthogonal transform and deep convolutional neural network. *Mach Vis Appl* **31**: 6

- Prey L, Hu Y, Schmidhalter U** (2019) High-throughput field phenotyping traits of grain yield formation and nitrogen use efficiency: optimizing the selection of vegetation indices and growth stages. *Front Plant Sci* **10**: 1672
- Qiu R, Yang C, Moghimi A, Zhang M, Steffenson BJ, Hirsch CD** (2019) Detection of fusarium head blight in wheat using a deep neural network and color imaging. *Remote Sens (Basel)* **11**: 2658
- Raja R, Nguyen TT, Slaughter DC, Fennimore SA** (2020) Real-time robotic weed knife control system for tomato and lettuce based on geometric appearance of plant labels. *Biosystems Engineering* **194**: 152–164
- Rascio A, Santis GD, Sorrentino G** (2020) A low-cost method for phenotyping wilting and recovery of wheat leaves under heat stress using semi-automated image analysis. *Plants* **9**: 718
- Rauf HT, Saleem BA, Lali MIU, Khan MA, Sharif M, Bukhari SAC** (2019) A citrus fruits and leaves dataset for detection and classification of citrus diseases through machine learning. *Data Brief* **26**: 104340
- Raza S-A, Smith HK, Clarkson GJJ, Taylor G, Thompson AJ, Clarkson J, Rajpoot NM** (2014) Automatic detection of regions in spinach canopies responding to soil moisture deficit using combined visible and thermal imagery. *PLoS One* **9**: e97612
- Reynolds D, Baret F, Welcker C, Bostrom A, Ball J, Cellini F, Lorence A, Chawade A, Khafif M, Noshita K, et al.** (2019) What is cost-efficient phenotyping? Optimizing costs for different scenarios. *Plant Sci* **282**: 14–22
- Rieke, N, Hancox, J, Li, W, Milletari F, Roth HR, Albarqouni S, Bakas S, Galtier MN, Landman BA, Maier-Hein K et al.** (2020) The future of digital health with federated learning. *NPJ Digit Med* **3**: 119
- Ristova D, Rosas U, Krouk G, Ruffel S, Birnbaum KD, Coruzzi GM** (2013) RootScape: a landmark-based system for rapid screening of root architecture in Arabidopsis. *Plant Physiol* **161**: 1086–1096
- Rodriguez FA, Blasch G, BlasDefournych P, Ortiz-Monasterio JJ, Schulthess U, Zarco-Tejada PJ, Taylor JA, Gérard B** (2018) Multi-temporal and spectral analysis of high-resolution hyperspectral airborne imagery for precision agriculture: assessment of wheat grain yield and grain protein content. *Remote Sens (Basel)* **10**: 930
- Rosas U, Cibrian-Jaramillo A, Ristova D, Banta JA, Gifford ML, Fan AH, Zhou RW, Kim GJ, Krouk G, Birnbaum KD, et al.** (2013) Integration of responses within and across Arabidopsis natural accessions uncovers loci controlling root systems architecture. *Proc Natl Acad Sci U S A* **110**: 15133–15138
- Sa I, Popović M, Khanna R, Chen Z, Lottes P, Liebisch F, Nieto J, Stachniss C, Walter A, Siegwart R** (2018) WeedMap: a large-scale semantic weed mapping framework using aerial multispectral imaging and deep neural network for precision farming. *Remote Sens (Basel)* **10**: 1423
- Santos FA, Palmeira ES, Jesus GJ** (2019) An image dataset of cut-test-classified cocoa beans. *Data Brief* **24**: 103916
- dos Santos Ferreira A, Matte Freitas D, Gonçalves da Silva G, Pistori H, Theophilo Folhes M** (2017) Weed detection in soybean crops using ConvNets. *Comput Electron Agric* **143**: 314–324
- Sasidharan Nair P, Vihinen M** (2013) VariBench: a benchmark database for variations. *Hum Mutat* **34**: 42–49
- Schaafsma GCP, Vihinen M** (2018) Representativeness of variation benchmark datasets. *BMC Bioinformatics* **19**: 461
- Seethepalli A, Guo H, Liu X, Griffiths M, Almtarfi H, Li Z, Liu S, Zare A, Fritschi FB, Blancaflor EB, et al.** (2020) Rhizovision crown: an integrated hardware and software platform for root crown phenotyping. *Plant Phenomics* **2020**: 3074916
- Seethepalli A, York L** (2019) RhizoVision Analyzer v1: software for high-throughput measurements from images of crop root crowns (deprecated). Zenodo doi: 10.5281/zenodo.2585892
- Selby P, Abbeloos R, Backlund JE, Basterrechea Salido M, Bauchet G, Benites-Alfaro OE, Birkett C, Calaminos VC, Carceller P, Cornut G, et al.** (2019) BrAPI-an application programming interface for plant breeding applications. *Bioinformatics* **35**: 4147–4155
- Selvaraj MG, Valderrama M, Guzman D, Valencia M, Ruiz H, Acharjee A** (2020) Machine learning for high-throughput field phenotyping and image processing provides insight into the association of above and below-ground traits in cassava (*Manihot esculenta* Crantz). *Plant Methods* **16**: 87
- Seo DH, Seomun S, Choi YD, Jang G** (2020) Root development and stress tolerance in rice: the key to improving stress tolerance without yield penalties. *Int J Mol Sci* **21**: 1807
- Seren Ü, Grimm D, Fitz J, Weigel D, Nordborg M, Borgwardt K, Korte A** (2017) AraPheno: a public database for Arabidopsis thaliana phenotypes. *Nucleic Acids Res* **45**: D1054–D1059
- Shanahan PW, Binley A, Whalley WR, Watts CW** (2015) The use of electromagnetics to monitor changes in soil moisture profiles beneath different wheat genotypes. *Soil Sci Soc Am J* **79**: 459
- Sharabiani VR, Kassar FH, Gilandeh YA, Ardabili SF** (2019) Application of soft computing methods and spectral reflectance data for wheat growth monitoring. *Iraqi J Agric Sci* **50**: 1064–1076
- Sharma A, Satish D, Sharma S, Gupta D** (2020) Indian major basmati paddy seed varieties images dataset. *Data Brief* **33**: 106460
- Sharma A, Satish D, Sharma S, Gupta D** (2019) iRSVPred: a web server for artificial intelligence based prediction of major basmati paddy seed varieties. *Front Plant Sci* **10**: 1791
- Shaw MW, Osborne TM** (2011) Geographic distribution of plant pathogens in response to climate change. *Plant Pathol* **60**: 31–43
- da Silva EE, Rojo Baio FH, Ribeiro Teodoro LP, da Silva Junior CA, Borges RS, Teodoro PE** (2020) UAV-multispectral and vegetation indices in soybean grain yield prediction based on in situ observation. *Remote Sens Appl Soc Environ* **18**: 100318
- Singh D, Jain N, Jain P, Kayal P, Kumawat S, Batra N** (2020) Plantdoc: a dataset for visual plant disease detection. *In Proceedings of the 7th ACM IKDD CoDS and 25th COMAD*. ACM, New York, NY, USA, pp 249–253
- Sirault XRR, James RA, Furbank RT** (2009) A new screening method for osmotic component of salinity tolerance in cereals using infrared thermography. *Funct Plant Biol* **36**: 970
- Skelsey P, Cooke DEL, Lynott JS, Lees AK** (2016) Crop connectivity under climate change: future environmental and geographic risks of potato late blight in Scotland. *Glob Chang Biol* **22**: 3724–3738
- Skovsen S, Dyrmann M, Mortensen AK, Laursen MS, Gislum R, Eriksen J, Farkhani S, Karstoft H, Jørgensen RN** (2019) The grassclover image dataset for semantic and hierarchical species understanding in agriculture. *In 2019 IEEE/CVF Conference on Computer Vision and Pattern Recognition Workshops (CVPRW)*. IEEE, pp 2676–2684
- Sodhi P, Vijayarangan S, Wettergreen D** (2017) In-field segmentation and identification of plant structures using 3D imaging. *In 2017 IEEE/RSJ International Conference on Intelligent Robots and Systems (IROS)*. IEEE, pp 5180–5187
- Soltaninejad M, Sturrock CJ, Griffiths M, Pridmore TP, Pound MP** (2020) Three dimensional root CT segmentation using multi-resolution encoder-decoder networks. *IEEE Trans Image Process* **29**: 6667–6679
- Somerville GJ, Jørgensen RN, Bojer OM, Rydahl P, Dyrmann M, Andersen P, Jensen NP, Green O** (2019) Marrying futuristic weed mapping with current herbicide sprayer capacities. *In JV Stafford, ed, Precision Agriculture '19*. Wageningen Academic Publishers, The Netherlands, pp 231–237
- Song J-M, Guan Z, Hu J, Guo C, Yang Z, Wang S, Liu D, Wang B, Lu S, Zhou R, et al.** (2020) Eight high-quality genomes reveal pan-genome architecture and ecotype differentiation of Brassica napus. *Nat Plants* **6**: 34–45
- Srayeddin I, Doussan C** (2009) Estimation of the spatial variability of root water uptake of maize and sorghum at the field scale by electrical resistivity tomography. *Plant Soil* **319**: 185–207
- Sudars K, Jasko J, Namatevs I, Ozola L, Badaukis N** (2020) Dataset of annotated food crops and weed images for robotic computer vision control. *Data Brief* **31**: 105833

- Sugiura R, Tsuda S, Tamiya S, Itoh A, Nishiwaki K, Murakami N, Shibuya Y, Hirafuji M, Nuske S** (2016) Field phenotyping system for the assessment of potato late blight resistance using RGB imagery from an unmanned aerial vehicle. *Biosyst Eng* **148**: 1–10
- Taghavi Namin S, Esmailzadeh M, Najafi M, Brown TB, Borevitz JO** (2018) Deep phenotyping: deep learning for temporal phenotype/genotype classification. *Plant Methods* **14**: 66
- Tattaris M, Reynolds MP, Chapman SC** (2016) A direct comparison of remote sensing approaches for high-throughput phenotyping in plant breeding. *Front Plant Sci* **7**: 1131
- Teimouri N, Dyrmann M, Nielsen PR, Mathiassen SK, Somerville GJ, Jørgensen RN** (2018) Weed growth stage estimator using deep convolutional neural networks. *Sensors* **18**: 1580
- Tetila EC, Machado BB, Menezes GK, Da Silva Oliveira A, Alvarez M, Amorim WP, De Souza Belete NA, Da Silva GG, Pistori H** (2020) Automatic recognition of soybean leaf diseases using UAV images and deep convolutional neural networks. *IEEE Geosci Remote Sensing Lett* **17**: 903–907
- Thapa S, Jessup KE, Pradhan GP, Rudd JC, Liu S, Mahan JR, Devkota RN, Baker JA, Xue Q** (2018) Canopy temperature depression at grain filling correlates to winter wheat yield in the U.S. Southern High Plains. *Field Crops Res* **217**: 11–19
- Tian K, Li J, Zeng J, Evans A, Zhang L** (2019) Segmentation of tomato leaf images based on adaptive clustering number of K-means algorithm. *Comput Electron Agric* **165**: 104962
- Topp CN, Iyer-Pascuzzi AS, Anderson JT, Lee C-R, Zurek PR, Symonova O, Zheng Y, Bucksch A, Mileyko Y, Galkovskiy T, et al.** (2013) 3D phenotyping and quantitative trait locus mapping identify core regions of the rice genome controlling root architecture. *Proc Natl Acad Sci U S A* **110**: E1695–E1704
- Trachsel S, Dhliwayo T, Gonzalez Perez L, Mendoza Lugo JA, Trachsel M** (2019) Estimation of physiological genomic estimated breeding values (PGEBV) combining full hyperspectral and marker data across environments for grain yield under combined heat and drought stress in tropical maize (*Zea mays* L.). *PLoS One* **14**: e0212200
- Trachsel S, Kaeppeler SM, Brown KM, Lynch JP** (2011) Shovelomics: high throughput phenotyping of maize (*Zea mays* L.) root architecture in the field. *Plant Soil* **341**: 75–87
- Ubbens JR, Stavness I** (2017) Deep plant phenomics: a deep learning platform for complex plant phenotyping tasks. *Front Plant Sci* **8**: 1190
- Uchiyama H, Sakurai S, Mishima M, Arita D, Okayasu T, Shimada A, Taniguchi R** (2017) An easy-to-setup 3D phenotyping platform for KOMATSUNA dataset. *In* 2017 IEEE International Conference on Computer Vision Workshops (ICCVW). IEEE, pp 2038–2045
- Umamaheswari S, Arjun R, Meganathan D** (2018) Weed detection in farm crops using parallel image processing. *In* 2018 Conference on Information and Communication Technology (CICT). IEEE, pp 1–4
- Uzal LC, Grinblat GL, Namias R, Larese MG, Bianchi JS, Morandi EN, Granitto PM** (2018) Seed-per-pod estimation for plant breeding using deep learning. *Comput Electron Agric* **150**: 196–204
- Vadez V, Kholová J, Hummel G, Zhokhavets U, Gupta SK, Hash CT** (2015) LeasyScan: a novel concept combining 3D imaging and lysimetry for high-throughput phenotyping of traits controlling plant water budget. *J Exp Bot* **66**: 5581–5593
- van Klompenburg T, Kassahun A, Catal C** (2020) Crop yield prediction using machine learning: a systematic literature review. *Comput Electron Agric* **177**: 105709
- Vázquez-Arellano M, Reiser D, Paraforos DS, Garrido-Izard M, Burce MEC, Griepentrog HW** (2018) 3-D reconstruction of maize plants using a time-of-flight camera. *Comput Electron Agric* **145**: 235–247
- Vega FA, Ramírez FC, Saiz MP, Rosúa FO** (2015) Multi-temporal imaging using an unmanned aerial vehicle for monitoring a sunflower crop. *Biosyst Eng* **132**: 19–27
- Veley KM, Berry JC, Fentress SJ, Schachtman DP, Baxter I, Bart R** (2017) High-throughput profiling and analysis of plant responses over time to abiotic stress. *Plant Direct* **1**: e00023
- Vergara-Diaz O, Kefauver SC, Elazab A, Nieto-Taladriz MT, Araus JL** (2015) Grain yield losses in yellow-rusted durum wheat estimated using digital and conventional parameters under field conditions. *Crop J* **3**: 200–210
- Walter J, Edwards J, Cai J, McDonald G, Miklavcic SJ, Kuchel H** (2019) High-throughput field imaging and basic image analysis in a wheat breeding programme. *Front Plant Sci* **10**: 449
- Wang N, Zhang N, Wei J, Stoll Q, Peterson DE** (2007) A real-time, embedded, weed-detection system for use in wheat fields. *Biosyst Eng* **98**: 276–285
- Wang S, Zhang X, Ma Y, Li X, Cheng M, Zhang X, Liu L** (2018a) Detecting sulfuric and nitric acid rain stresses on quercus glauca through hyperspectral responses. *Sensors* **18**: 830
- Wang Y, Wen W, Wu S, Wang C, Yu Z, Guo X, Zhao C** (2018b) Maize plant phenotyping: comparing 3D laser scanning, multi-view stereo reconstruction, and 3D digitizing estimates. *Remote Sens (Basel)* **11**: 63
- Werner C, Correia O, Beyschlag W** (1999) Two different strategies of Mediterranean macchia plants to avoid photoinhibitory damage by excessive radiation levels during summer drought. *Acta Oecol* **20**: 15–23
- Whalley WR, Binley A, Watts CW, Shanahan P, Dodd IC, Ober ES, Ashton RW, Webster CP, White RP, Hawkesford MJ** (2017) Methods to estimate changes in soil water for phenotyping root activity in the field. *Plant Soil* **415**: 407–422
- Wojciechowski T, Gooding MJ, Ramsay L, Gregory PJ** (2009) The effects of dwarfing genes on seedling root growth of wheat. *J Exp Bot* **60**: 2565–2573
- Wu Q, Wu J, Zheng B, Guo Y** (2018) Optimizing soil-coring strategies to quantify root-length-density distribution in field-grown maize: virtual coring trials using 3-D root architecture models. *Ann Bot* **121**: 809–819
- Wu X, Zhan C, Lai Y-K, Cheng M-M, Yang J** (2019) IP102: a large-scale benchmark dataset for insect pest recognition. *In* 2019 IEEE/CVF Conference on Computer Vision and Pattern Recognition (CVPR). IEEE, pp 8779–8788
- Yasrab R, Pound MP, French AP, Pridmore TP** (2020a) PhenomNet: bridging phenotype-genotype gap: a CNN-LSTM based automatic plant root anatomization system. *BioRxiv* doi: 10.1101/2020.05.03.075184
- Yasrab R, Pound MP, French AP, Pridmore TP** (2020b) RootNet: a convolutional neural networks for complex plant root phenotyping from high-definition datasets. *BioRxiv* doi: 10.1101/2020.05.01.073270
- York LM, Young CA, Mattupalli C, Seethepalli A** (2018) Images and statistical analysis of alfalfa root crowns from inside and outside disease rings caused by cotton root rot. *Zenodo*. doi: 10.5281/zenodo.2172832
- Yuan W, Wijewardane NK, Jenkins S, Bai G, Ge Y, Graef GL** (2019) Early prediction of soybean traits through color and texture features of canopy RGB imagery. *Sci Rep* **9**: 14089
- Yu C, Fan X, Hu Z, Xia X, Zhao Y, Li R, Bai Y** (2020) Segmentation and measurement scheme for fish morphological features based on Mask R-CNN. *Inf Process Agric* **7**: 523–534
- Yu K, Kirchgessner N, Grieder C, Walter A, Hund A** (2017) An image analysis pipeline for automated classification of imaging light conditions and for quantification of wheat canopy cover time series in field phenotyping. *Plant Methods* **13**: 15
- Zamir D** (2013) Where have all the crop phenotypes gone? *PLoS Biol* **11**: e1001595
- Zeng W, Li M** (2020) Crop leaf disease recognition based on Self-Attention convolutional neural network. *Comput Electron Agric* **172**: 105341



- Zenone T, Morelli G, Teobaldelli M, Fischanger F, Matteucci M, Sordini M, Armani A, Ferrè C, Chiti T, Seufert G** (2008) Preliminary use of ground-penetrating radar and electrical resistivity tomography to study tree roots in pine forests and poplar plantations. *Funct Plant Biol* **35**: 1047–1058
- Zhang C, Ren H, Qin Q, Ersoy OK** (2017) A new narrow band vegetation index for characterizing the degree of vegetation stress due to copper: the copper stress vegetation index (CSV). *Remote Sens Lett* **8**: 576–585
- Zhang J, Liu X, Liang Y, Cao Q, Tian Y, Zhu Y, Cao W, Liu X** (2019a) Using a portable active sensor to monitor growth parameters and predict grain yield of winter wheat. *Sensors* **19**: 1108
- Zhang L, Niu Y, Zhang H, Han W, Li G, Tang J, Peng X** (2019b) Maize canopy temperature extracted from UAV thermal and RGB imagery and its application in water stress monitoring. *Front Plant Sci* **10**: 1270
- Zhang X, Friedl MA, Schaaf CB, Strahler AH, Hodges JCF, Gao F, Reed BC, Huete A** (2003) Monitoring vegetation phenology using MODIS. *Remote Sens Environ* **84**: 471–475
- Zhao H, Yang C, Guo W, Zhang L, Zhang D** (2020) Automatic estimation of crop disease severity levels based on vegetation index normalization. *Remote Sens (Basel)* **12**: 1930
- Zhao Q, Feng Q, Lu H, Li Y, Wang A, Tian Q, Zhan Q, Lu Y, Zhang L, Huang T, et al.** (2018) Pan-genome analysis highlights the extent of genomic variation in cultivated and wild rice. *Nat Genet* **50**: 278–284
- Zheng Y-Y, Kong J-L, Jin X-B, Wang X-Y, Zuo M** (2019) CropDeep: the crop vision dataset for deep-learning-based classification and detection in precision agriculture. *Sensors* **19**: 1058
- Ziliani M, Parkes S, Hoteit I, McCabe M** (2018) Intra-season crop height variability at commercial farm scales using a fixed-wing UAV. *Remote Sens (Basel)* **10**: 2007
